# Supplementary material
Source: ML conference proceedings conference paper supplement (https://openreview.net/forum?id=7tMgzSvopH)
Supplement: supplementary_material [file attachment]

## MMS Dataset and Benchmark

*The most extensive open massively multilingual corpus of datasets for training sentiment models. The corpus consists of 79 manually selected from over 350 datasets reported in the scientific literature based on strict quality criteria and covers 27 languages.*

Despite impressive advancements in multilingual corpora collection and model training, developing large-scale deployments of multilingual models still presents a significant challenge. This is particularly true for language tasks that are culture-dependent. One such example is the area of multilingual sentiment analysis, where affective markers can be subtle and deeply ensconced in culture.

This work presents the most extensive open massively multilingual corpus of datasets for training sentiment models. The corpus consists of 79 manually selected datasets from over 350 datasets reported in the scientific literature based on strict quality criteria. The corpus covers 27 languages representing 6 language families. Datasets can be queried using several linguistic and functional features. In addition, we present a multi-faceted sentiment classification benchmark summarizing hundreds of experiments conducted on different base models, training objectives, dataset collections, and fine-tuning strategies.

## Dataset

---

[Massively Multilingual Sentiment Datasets](#)

## Analysis and benchmarking

---

[HuggingFace Spaces with Analysis and Benchmark](#)

## General statistics about the dataset

---

It may take some time to download the dataset and generate train set inside HuggingFace dataset. Please be patient.

```
mms_dataset = datasets.load_dataset("Brand24/mms")
```

```
mms_dataset_df = mms_dataset["train"].to_pandas()
```

How many examples do we have?

```
mms_dataset.num_rows
```

```
{'train': 6164762}
```

## Features

We provide not only texts and sentiment labels but we assigned many additional dimensions for datasets and languages, hence it is possible to splice and dice them as you want and need.

```
mms_dataset["train"].features
```

```
{'_id': Value(dtype='int32', id=None),
 'text': Value(dtype='string', id=None),
 'label': ClassLabel(names=['negative', 'neutral', 'positive'], id=None),
 'original_dataset': Value(dtype='string', id=None),
 'domain': Value(dtype='string', id=None),
 'language': Value(dtype='string', id=None),
 'Family': Value(dtype='string', id=None),
 'Genus': Value(dtype='string', id=None),
 'Definite articles': Value(dtype='string', id=None),
 'Indefinite articles': Value(dtype='string', id=None),
 'Number of cases': Value(dtype='string', id=None),
 'Order of subject, object, verb': Value(dtype='string', id=None),
 'Negative morphemes': Value(dtype='string', id=None),
 'Polar questions': Value(dtype='string', id=None),
 'Position of negative word wrt SOV': Value(dtype='string', id=None),
 'Prefixing vs suffixing': Value(dtype='string', id=None),
 'Coding of nominal plurality': Value(dtype='string', id=None),
 'Grammatical genders': Value(dtype='string', id=None),
 'cleanlab_self_confidence': Value(dtype='float32', id=None)}
```

## Example

```
mms_dataset["train"][2001000]
```

```
{'_id': 2001000,
 'text': 'I was a tomboy and this has such great memories for me. They fit exactly how I remember, PERFECTLY!!',
 'label': 2,
 'original_dataset': 'en_amazon',
 'domain': 'reviews',
 'language': 'en',
 'Family': 'Indo-European',
 'Genus': 'Germanic',
 'Definite articles': 'definite word distinct from demonstrative',
 'Indefinite articles': 'indefinite word distinct from one',
 'Number of cases': '2',
 'Order of subject, object, verb': 'SVO',
 'Negative morphemes': 'negative particle',
 'Polar questions': 'interrogative word order',
 'Position of negative word wrt SOV': 'SNegVO',
 'Prefixing vs suffixing': 'strongly suffixing',
```

```
'Coding of nominal plurality': 'plural suffix',  
'Grammatical genders': 'no grammatical gender',  
'cleanlab_self_confidence': 0.9978116750717163}
```

## Classes

```
labels = mms_dataset["train"].features["label"].names  
labels
```

```
['negative', 'neutral', 'positive']
```

```
mms_dataset_df["label_name"] = mms_dataset_df["label"].apply(lambda x: labels[x])
```

## Classes distribution

```
labels_stats_df = pd.DataFrame(mms_dataset_df.label_name.value_counts())  
labels_stats_df["percentage"] = (labels_stats_df["label_name"] / labels_stats_df["label_name"]  
labels_stats_df
```

|          | label_name | percentage |
|----------|------------|------------|
| positive | 3494478    | 0.567      |
| neutral  | 1341354    | 0.218      |
| negative | 1328930    | 0.216      |

## Sentiment orientation for each language

```
cols = ['language', 'label_name']  
mms_dataset_df[cols].value_counts().to_frame().reset_index().rename(columns={0: 'count'}).sort
```

|     | language | label_name | count  |
|-----|----------|------------|--------|
| 7   | ar       | negative   | 138899 |
| 4   | ar       | neutral    | 192774 |
| 1   | ar       | positive   | 600402 |
| 53  | bg       | negative   | 13930  |
| 41  | bg       | neutral    | 28657  |
| ... | ...      | ...        | ...    |
| 62  | ur       | neutral    | 8585   |
| 67  | ur       | positive   | 5836   |
| 9   | zh       | negative   | 117967 |
| 21  | zh       | neutral    | 69016  |
| 6   | zh       | positive   | 144719 |

81 rows × 3 columns

## Per language

```
cols = ['language']
mms_dataset_df[cols].value_counts().to_frame().reset_index().rename(columns={0: 'count'}).sort
```

|    | language | count   |
|----|----------|---------|
| 1  | ar       | 932075  |
| 15 | bg       | 62150   |
| 20 | bs       | 36183   |
| 8  | cs       | 196287  |
| 4  | de       | 315887  |
| 0  | en       | 2330486 |
| 2  | es       | 418712  |
| 23 | fa       | 13525   |
| 6  | fr       | 210631  |
| 25 | he       | 8619    |
| 22 | hi       | 16999   |
| 12 | hr       | 77594   |
| 16 | hu       | 56682   |
| 24 | it       | 12065   |
| 7  | ja       | 209780  |
| 26 | lv       | 5790    |
| 5  | pl       | 236688  |
| 9  | pt       | 157834  |
| 11 | ru       | 110930  |
| 17 | sk       | 56623   |
| 10 | sl       | 113543  |
| 18 | sq       | 44284   |
| 13 | sr       | 76368   |
| 19 | sv       | 41346   |
| 14 | th       | 72319   |
| 21 | ur       | 19660   |
| 3  | zh       | 331702  |

## Example of filtering datasets

## Choose only Polish

```
pl = mms_dataset.filter(lambda row: row['language'] == 'pl')
```

```
pl["train"].to_pandas().sample(5)
```

|        |         |                                                               |       |                      |              |          |                   |        | Definite      | Indef   |
|--------|---------|---------------------------------------------------------------|-------|----------------------|--------------|----------|-------------------|--------|---------------|---------|
|        | _id     | text                                                          | label | original_dataset     | domain       | language | Family            | Genus  | articles      | article |
| 215921 | 5119386 | Typujcie jaki<br>dzisiaj będzie<br>wynik St.Pats -<br>Legi... | 2     | pl_twitter_sentiment | social_media | pl       | Indo-<br>European | Slavic | no<br>article | no ar   |
| 86525  | 4989990 | @KaczmarSF<br>Przyjemne ciarki<br>mam, gdy<br>patrzę na...    | 2     | pl_twitter_sentiment | social_media | pl       | Indo-<br>European | Slavic | no<br>article | no ar   |
| 66031  | 4969496 | szkoda bylo<br>czasu i kasy .                                 | 0     | pl_polemo            | reviews      | pl       | Indo-<br>European | Slavic | no<br>article | no ar   |
| 137768 | 5041233 | @shinyvalentine<br>mam ja w dupie<br>lecz bylo to kr...       | 0     | pl_twitter_sentiment | social_media | pl       | Indo-<br>European | Slavic | no<br>article | no ar   |
| 118766 | 5022231 | @itiNieWracaj<br>pokazują to<br>gdzieś?                       | 2     | pl_twitter_sentiment | social_media | pl       | Indo-<br>European | Slavic | no<br>article | no ar   |

## Use cases

### Case 1

Thus, when training a sentiment classifier using our dataset, one may download different facets of the collection. For instance, one can download all datasets in [Slavic](#) languages in which polar questions are formed using the interrogative word order or download all datasets from the [Afro-Asiatic](#) language family with no morphological case-making.

```
slavic = mms_dataset.filter(lambda row: row["Genus"] == "Slavic" and row["Polar questions"] ==
```

```
slavic
```

```
DatasetDict({
  train: Dataset({
    features: ['_id', 'text', 'label', 'original_dataset', 'domain', 'language',
```

```
'Family', 'Genus', 'Definite articles', 'Indefinite articles', 'Number of cases', 'Order of
subject, object, verb', 'Negative morphemes', 'Polar questions', 'Position of negative word
wrt SOV', 'Prefixing vs suffixing', 'Coding of nominal plurality', 'Grammatical genders',
'cleanlab_self_confidence'],
    num_rows: 252910
})
})
```

## Case 2

```
afro_asiatic = mms_dataset.filter(lambda row: row["Family"] == "Afro-Asiatic" and row["Number
```

```
afro_asiatic
```

```
DatasetDict({
  train: Dataset({
    features: ['_id', 'text', 'label', 'original_dataset', 'domain', 'language',
'Family', 'Genus', 'Definite articles', 'Indefinite articles', 'Number of cases', 'Order of
subject, object, verb', 'Negative morphemes', 'Polar questions', 'Position of negative word
wrt SOV', 'Prefixing vs suffixing', 'Coding of nominal plurality', 'Grammatical genders',
'cleanlab_self_confidence'],
    num_rows: 8619
  })
})
```

## Dataset Curators

The corpus was put together by

- [@laugustyniak](#)
- [@swozniak](#)
- [@mgruza](#)
- [@pgramacki](#)
- [@krajda](#)
- [@mmorzy](#)
- [@tkajdanowicz](#)

## Citation

```
@misc{augustyniak2023massively,
  title={Massively Multilingual Corpus of Sentiment Datasets and Multi-faceted Sentiment C
  author={Łukasz Augustyniak and Szymon Woźniak and Marcin Gruza and Piotr Gramacki and Kr
  year={2023},
  eprint={2306.07902},
  archivePrefix={arXiv},
  primaryClass={cs.CL}
}
```

## Licensing Information

---

These data are released under this licensing scheme. We do not own any text from which these data and datasets have been extracted.

We license the actual packaging of these data under the Attribution-NonCommercial 4.0 International (CC BY-NC 4.0) <https://creativecommons.org/licenses/by-nc/4.0/>

This work is published from Poland.

Should you consider that our data contains material that is owned by you and should, therefore not be reproduced here, please: \* Clearly identify yourself with detailed contact data such as an address, telephone number, or email address at which you can be contacted. \* Clearly identify the copyrighted work claimed to be infringed. \* Clearly identify the material claimed to be infringing and the information reasonably sufficient to allow us to locate the material.

We will comply with legitimate requests by removing the affected sources from the next release of the corpus.
