# Supplementary material
Source: ML conference proceedings conference paper supplement (https://openreview.net/forum?id=7tMgzSvopH)
Supplement: supplementary_material [file attachment]

## Benchmark results

*The results of our benchmark for several Language Models using data from MMS.*

Our preliminary results has been presented in (Rajda et al. 2022) and finally presented in (Augustyniak et al. 2023) review at NeurIPS'23.

### Benchmark results - F1 Macro scores

#### Models

| Model             | Inf. time [s] | #params | #langs | base        | data                                                                                 | reference                   |
|-------------------|---------------|---------|--------|-------------|--------------------------------------------------------------------------------------|-----------------------------|
| mT5               | 1.69          | 277M    | 101    | T5          | <i>CC</i> <sup>b</sup>                                                               | (Xue et al. 2021)           |
| LASER             | 1.64          | 52M     | 93     | BiLSTM      | <i>OPUS</i> <sup>c</sup>                                                             | (Artetxe and Schwenk 2019)  |
| mBERT             | 1.49          | 177M    | 104    | BERT        | Wiki                                                                                 | (Devlin et al. 2019)        |
| MPNet**           | 1.38          | 278M    | 53     | XLNet       | <i>OPUS</i> <sup>c</sup> , <i>MUSE</i> <sup>d</sup> , <i>Wikititles</i> <sup>e</sup> | (Reimers and Gurevych 2020) |
| XLNet-dist**      | 1.37          | 278M    | 53     | XLNet       | <i>OPUS</i> <sup>c</sup> , <i>MUSE</i> <sup>d</sup> , <i>Wikititles</i> <sup>e</sup> | (Reimers and Gurevych 2020) |
| XLNet             | 1.37          | 278M    | 100    | XLNet       | CC                                                                                   | (Conneau et al. 2020)       |
| LaBSE             | 1.36          | 470M    | 109    | BERT        | CC, Wiki + mined bitexts                                                             | (Feng et al. 2020)          |
| DistilBERT        | 0.79          | 134M    | 104    | BERT        | Wiki                                                                                 | (Sanh et al. 2020)          |
| mUSE-dist**       | 0.79          | 134M    | 53     | DistilBERT  | <i>OPUS</i> <sup>c</sup> , <i>MUSE</i> <sup>d</sup> , <i>Wikititles</i> <sup>e</sup> | (Reimers and Gurevych 2020) |
| mUSE-transformer* | 0.65          | 85M     | 16     | transformer | mined QA + bitexts, SNLI                                                             | (Yang et al. 2020)          |

| Model     | Inf.<br>time<br>[s] | #params | #langs | base | data                     | reference          |
|-----------|---------------------|---------|--------|------|--------------------------|--------------------|
| mUSE-cnn* | 0.12                | 68M     | 16     | CNN  | mined QA + bitexts, SNLI | (Yang et al. 2020) |

- \* mUSE models were used in TensorFlow implementation in contrast to others in torch
- a Base model is either monolingual version on which it was based or another multilingual model which was used and adopted
- b Colossal Clean Crawled Corpus in multilingual version (mC4)
- c multiple datasets from OPUS website (<https://opus.nlpl.eu>)
- d bilingual dictionaries from MUSE (<https://github.com/facebookresearch/MUSE>)
- e just titles from wiki articles in multiple languages

## Results

### Linear Head

| Model            | Experiment |    |     |    |    |    |    |    |    |    |    |    |    |    |    |    |    |    |    |    |    |    |    |    |    |    |    |    |    |    |  |  |
|------------------|------------|----|-----|----|----|----|----|----|----|----|----|----|----|----|----|----|----|----|----|----|----|----|----|----|----|----|----|----|----|----|--|--|
|                  | lang       | ds | all | en | ar | es | zh | de | pl | fr | ja | cs | pt | sl | ru | hr | sr | th | bg | hu | sk | sq | sv | bs | ur | hi | fa | it | he | lv |  |  |
| XLM-R            | 52         | 51 | 61  | 58 | 48 | 59 | 59 | 67 | 58 | 63 | 61 | 58 | 39 | 49 | 53 | 45 | 48 | 58 | 49 | 53 | 53 | 38 | 56 | 53 | 41 | 45 | 45 | 55 | 54 | 41 |  |  |
| LaBSE            | 54         | 53 | 61  | 59 | 53 | 60 | 57 | 65 | 58 | 63 | 60 | 59 | 44 | 55 | 55 | 52 | 48 | 55 | 57 | 52 | 54 | 41 | 53 | 57 | 34 | 42 | 52 | 61 | 55 | 53 |  |  |
| MPNet            | 54         | 55 | 62  | 64 | 51 | 61 | 59 | 66 | 55 | 65 | 62 | 58 | 41 | 55 | 55 | 50 | 48 | 55 | 58 | 52 | 49 | 45 | 53 | 59 | 29 | 41 | 62 | 62 | 54 | 43 |  |  |
| XLM-R-dist       | 52         | 51 | 59  | 61 | 45 | 59 | 58 | 64 | 55 | 62 | 61 | 55 | 41 | 53 | 49 | 51 | 47 | 52 | 55 | 52 | 52 | 43 | 54 | 58 | 35 | 46 | 50 | 56 | 49 | 45 |  |  |
| mT5              | 50         | 48 | 59  | 56 | 45 | 58 | 56 | 65 | 53 | 63 | 54 | 57 | 39 | 49 | 52 | 39 | 44 | 59 | 52 | 47 | 41 | 39 | 54 | 49 | 35 | 40 | 48 | 52 | 57 | 48 |  |  |
| mBERT            | 46         | 44 | 55  | 53 | 40 | 55 | 49 | 56 | 50 | 49 | 45 | 49 | 36 | 42 | 48 | 44 | 39 | 29 | 47 | 47 | 51 | 37 | 47 | 50 | 30 | 48 | 41 | 54 | 66 | 34 |  |  |
| DistilmBERT      | 44         | 42 | 54  | 50 | 39 | 55 | 45 | 56 | 46 | 50 | 40 | 41 | 35 | 41 | 46 | 40 | 39 | 40 | 45 | 47 | 49 | 36 | 49 | 50 | 26 | 37 | 29 | 54 | 69 | 28 |  |  |
| mUSE-dist        | 50         | 50 | 59  | 58 | 48 | 59 | 54 | 63 | 55 | 60 | 53 | 52 | 42 | 50 | 53 | 47 | 46 | 47 | 59 | 50 | 50 | 37 | 51 | 57 | 31 | 38 | 41 | 57 | 52 | 43 |  |  |
| LASER            | 48         | 46 | 55  | 52 | 50 | 55 | 50 | 59 | 54 | 57 | 52 | 52 | 39 | 46 | 46 | 45 | 44 | 44 | 50 | 50 | 48 | 42 | 47 | 52 | 28 | 37 | 43 | 56 | 47 | 38 |  |  |
| mUSE-transformer | 45         | 47 | 55  | 55 | 48 | 57 | 52 | 59 | 51 | 56 | 52 | 40 | 43 | 41 | 50 | 42 | 40 | 45 | 46 | 52 | 43 | 39 | 46 | 48 | 28 | 40 | 29 | 54 | 27 | 23 |  |  |
| mUSE-cnn         | 44         | 45 | 53  | 52 | 44 | 54 | 51 | 57 | 52 | 53 | 51 | 42 | 41 | 42 | 46 | 43 | 38 | 46 | 47 | 47 | 43 | 36 | 49 | 48 | 33 | 48 | 32 | 52 | 27 | 23 |  |  |

### BiLSTM Head

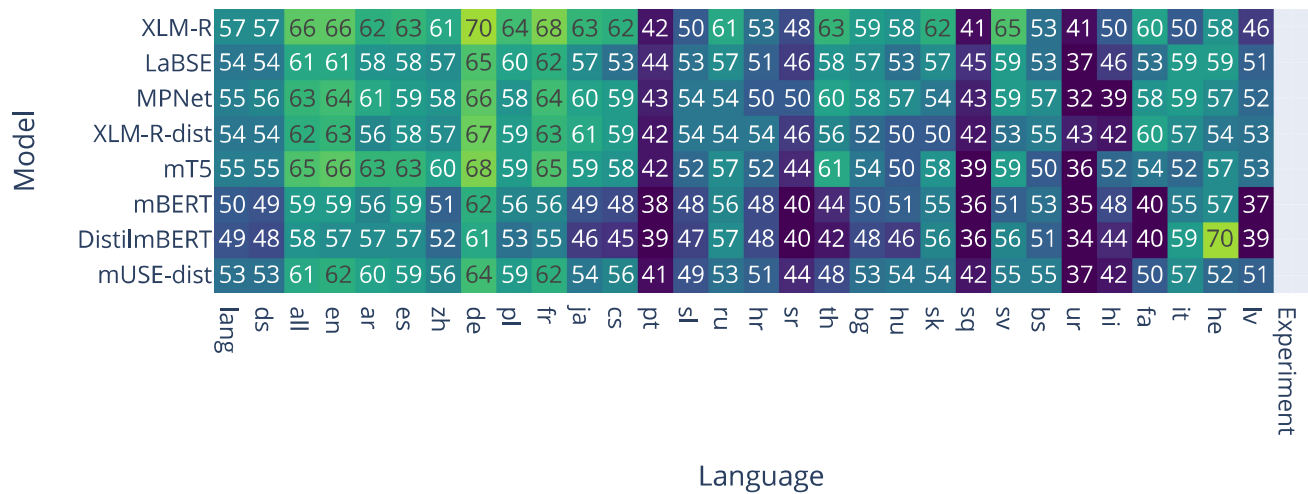

## Fine-tuning

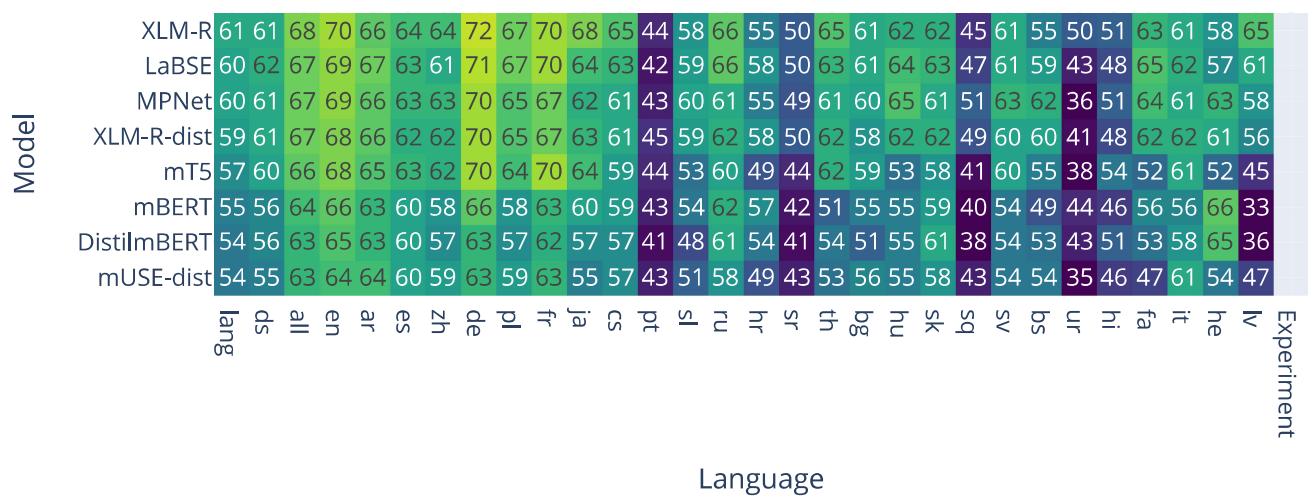

## References

- Artetxe, Mikel, and Holger Schwenk. 2019. "Massively Multilingual Sentence Embeddings for Zero-Shot Cross-Lingual Transfer and Beyond." *Transactions of the Association for Computational Linguistics* 7 (September): 597–610. [https://doi.org/10.1162/tacl\\_a\\_00288](https://doi.org/10.1162/tacl_a_00288).
- Augustyniak, Łukasz, Szymon Woźniak, Marcin Gruza, Piotr Gramacki, Krzysztof Rajda, Mikołaj Morzy, and Tomasz Kajdanowicz. 2023. "Massively Multilingual Corpus of Sentiment Datasets and Multi-Faceted Sentiment Classification Benchmark." <https://arxiv.org/abs/2306.07902>.
- Conneau, Alexis, Kartikay Khandelwal, Naman Goyal, Vishrav Chaudhary, Guillaume Wenzek, Francisco Guzmán, Edouard Grave, Myle Ott, Luke Zettlemoyer, and Veselin Stoyanov. 2020. "Unsupervised Cross-Lingual Representation Learning at Scale." In *Proceedings of the 58th Annual Meeting of the Association for Computational Linguistics*, 8440–51. Online: Association for Computational Linguistics. <https://doi.org/10.18653/v1/2020.acl-main.747>.
- Devlin, Jacob, Ming-Wei Chang, Kenton Lee, and Kristina Toutanova. 2019. "BERT: Pre-Training of Deep Bidirectional Transformers for Language Understanding." In *Proceedings of the 2019 Conference of the North American Chapter of the Association for Computational Linguistics: Human Language Technologies, Volume 1 (Long and Short Papers)*, 4171–86. Minneapolis, Minnesota: Association for Computational Linguistics. <https://doi.org/10.18653/v1/N19-1423>.
- Feng, Fangxiaoyu, Yinfei Yang, Daniel Cer, Naveen Arivazhagan, and Wei Wang. 2020. "Language-agnostic BERT Sentence Embedding." *Computing Research Repository* arXiv:2007.01852. <https://arxiv.org/abs/2007.01852>.
- Rajda, Krzysztof, Łukasz Augustyniak, Piotr Gramacki, Marcin Gruza, Szymon Woźniak, and Tomasz Kajdanowicz. 2022. "Assessment of Massively Multilingual Sentiment Classifiers." In *Proceedings of the 12th Workshop on Computational Approaches to Subjectivity, Sentiment & Social Media Analysis*, 125–40. Dublin, Ireland: Association for Computational Linguistics. <https://doi.org/10.18653/v1/2022.wassa-1.13>.
- Reimers, Nils, and Iryna Gurevych. 2020. "Making Monolingual Sentence Embeddings Multilingual Using Knowledge Distillation." In *Proceedings of the 2020 Conference on Empirical Methods in Natural Language Processing (EMNLP)*, 4512–25. Online: Association for Computational Linguistics. <https://doi.org/10.18653/v1/2020.emnlp-main.365>.
- Sanh, Victor, Lysandre Debut, Julien Chaumond, and Thomas Wolf. 2020. "DistilBERT, a distilled version of BERT: smaller, faster, cheaper and lighter." *Computing Research Repository* arXiv:1910.01108. <https://arxiv.org/abs/1910.01108>.
- Xue, Linting, Noah Constant, Adam Roberts, Mihir Kale, Rami Al-Rfou, Aditya Siddhant, Aditya Barua, and Colin Raffel. 2021. "MT5: A Massively Multilingual Pre-Trained Text-to-Text Transformer." In *Proceedings of the 2021 Conference of the North American Chapter of the Association for Computational Linguistics: Human Language Technologies*, 483–98. Online: Association for Computational Linguistics. <https://doi.org/10.18653/v1/2021.naacl-main.41>.
- Yang, Yinfei, Daniel Cer, Amin Ahmad, Mandy Guo, Jax Law, Noah Constant, Gustavo Hernandez Abrego, et al. 2020. "Multilingual Universal Sentence Encoder for Semantic Retrieval." In *Proceedings of the 58th Annual Meeting of the Association for Computational Linguistics: System Demonstrations*, 87–94. Online: Association for Computational Linguistics. <https://doi.org/10.18653/v1/2020.acl-demos.12>.
