# Supplementary material
Source: ML conference proceedings conference paper supplement (https://openreview.net/forum?id=7tMgzSvopH)
Supplement: supplementary_material [file attachment]

## Sheet: f1_scores_per_language
model_experiment	lang	f1_pos	f1_neg	f1_neu
FT_DistilmBERT	ar	0.947079	0.75612	0.531792
FT_DistilmBERT	bg	0.648084	0.588832	0.772234
FT_DistilmBERT	bs	0.670103	0.811881	0.593548
FT_DistilmBERT	cs	0.845694	0.696517	0.622797
FT_DistilmBERT	de	0.749004	0.881628	0.692819
FT_DistilmBERT	en	0.959278	0.791367	0.557344
FT_DistilmBERT	es	0.76755	0.841211	0.652739
FT_DistilmBERT	fa	0.79646	0.608696	0.701299
FT_DistilmBERT	fr	0.857341	0.933589	0.412639
FT_DistilmBERT	he	0.899083	0.820513	0.666667
FT_DistilmBERT	hi	0.821053	0.675676	0.534884
FT_DistilmBERT	hr	0.863568	0.734824	0.472
FT_DistilmBERT	hu	0.873346	0.564516	0.651163
FT_DistilmBERT	it	0.754098	0.709677	0.746269
FT_DistilmBERT	ja	0.894667	0.896414	0.248421
FT_DistilmBERT	lv	0.5	0.133333	0.869565
FT_DistilmBERT	pl	0.775095	0.820396	0.576471
FT_DistilmBERT	pt	0.475712	0.703746	0.55914
FT_DistilmBERT	ru	0.760563	0.808271	0.729223
FT_DistilmBERT	sk	0.882917	0.690909	0.645161
FT_DistilmBERT	sl	0.564356	0.46712	0.842474
FT_DistilmBERT	sq	0.915254	0.296296	0.313953
FT_DistilmBERT	sr	0.540773	0.819277	0.406504
FT_DistilmBERT	sv	0.677966	0.817204	0.608696
FT_DistilmBERT	th	0.870432	0.479339	0.674473
FT_DistilmBERT	ur	0.55	0.613333	0.650794
FT_DistilmBERT	zh	0.870319	0.909515	0.277778
FT_LaBSE	ar	0.954125	0.807475	0.584169
FT_LaBSE	bg	0.744337	0.811966	0.753304
FT_LaBSE	bs	0.71	0.899083	0.620253
FT_LaBSE	cs	0.942466	0.816265	0.535
FT_LaBSE	de	0.898798	0.906234	0.685829
FT_LaBSE	en	0.974347	0.87421	0.524556
FT_LaBSE	es	0.877902	0.843054	0.566967
FT_LaBSE	fa	0.866667	0.769231	0.734177
FT_LaBSE	fr	0.939589	0.938334	0.504378
FT_LaBSE	he	0.899083	0.789474	0.666667
FT_LaBSE	hi	0.712644	0.515152	0.701031
FT_LaBSE	hr	0.865269	0.726688	0.574627
FT_LaBSE	hu	0.86907	0.728571	0.73913
FT_LaBSE	it	0.898551	0.787879	0.622951
FT_LaBSE	ja	0.940575	0.915851	0.384466
FT_LaBSE	lv	0.83871	0.6	0.818182
FT_LaBSE	pl	0.859846	0.850148	0.687636
FT_LaBSE	pt	0.667643	0.694857	0.432749
FT_LaBSE	ru	0.859259	0.845173	0.710204
FT_LaBSE	sk	0.814664	0.758621	0.788462
FT_LaBSE	sl	0.765957	0.790698	0.68435
FT_LaBSE	sq	0.682353	0.722222	0.578431
FT_LaBSE	sr	0.716981	0.813559	0.496164
FT_LaBSE	sv	0.812183	0.804348	0.673575
FT_LaBSE	th	0.904992	0.704225	0.695853
FT_LaBSE	ur	0.55	0.514286	0.721805
FT_LaBSE	zh	0.913159	0.868345	0.413953
FT_MPNet	ar	0.953203	0.809544	0.571964
FT_MPNet	bg	0.752412	0.764444	0.753304
FT_MPNet	bs	0.741463	0.894009	0.645963
FT_MPNet	cs	0.956193	0.844118	0.431058
FT_MPNet	de	0.888777	0.904512	0.674309
FT_MPNet	en	0.97373	0.873131	0.531079
FT_MPNet	es	0.830295	0.862949	0.620012
FT_MPNet	fa	0.903226	0.814815	0.630137
FT_MPNet	fr	0.951049	0.919793	0.452899
FT_MPNet	he	0.899083	0.904762	0.666667
FT_MPNet	hi	0.682353	0.74359	0.6
FT_MPNet	hr	0.802528	0.730769	0.585185
FT_MPNet	hu	0.842718	0.828947	0.729927
FT_MPNet	it	0.865672	0.769231	0.645161
FT_MPNet	ja	0.924075	0.924272	0.332665
FT_MPNet	lv	0.875	0.6	0.731707
FT_MPNet	pl	0.839253	0.852702	0.660022
FT_MPNet	pt	0.669591	0.60049	0.545455
FT_MPNet	ru	0.9	0.861759	0.570136
FT_MPNet	sk	0.809816	0.678899	0.827907
FT_MPNet	sl	0.763326	0.781982	0.711688
FT_MPNet	sq	0.708934	0.789474	0.605769
FT_MPNet	sr	0.731343	0.765743	0.522613
FT_MPNet	sv	0.8	0.817204	0.707071
FT_MPNet	th	0.868552	0.773333	0.658768
FT_MPNet	ur	0.342857	0.575342	0.661417
FT_MPNet	zh	0.888285	0.886136	0.470852
FT_XLM-R	ar	0.906463	0.785841	0.708912
FT_XLM-R	bg	0.764331	0.688679	0.805907
FT_XLM-R	bs	0.683673	0.77551	0.686747
FT_XLM-R	cs	0.949946	0.781395	0.589651
FT_XLM-R	de	0.879143	0.8646	0.770482
FT_XLM-R	en	0.956001	0.814755	0.701908
FT_XLM-R	es	0.812001	0.829399	0.700436
FT_XLM-R	fa	0.866667	0.666667	0.765432
FT_XLM-R	fr	0.883627	0.891102	0.680062
FT_XLM-R	he	0.899083	0.820513	0.666667
FT_XLM-R	hi	0.755556	0.74359	0.551724
FT_XLM-R	hr	0.840979	0.590747	0.673611
FT_XLM-R	hu	0.849421	0.641221	0.774648
FT_XLM-R	it	0.793651	0.787879	0.6875
FT_XLM-R	ja	0.851005	0.88755	0.681458
FT_XLM-R	lv	0.83871	0.666667	0.844444
FT_XLM-R	pl	0.893861	0.802164	0.690476
FT_XLM-R	pt	0.705548	0.590123	0.547425
FT_XLM-R	ru	0.901961	0.785441	0.730924
FT_XLM-R	sk	0.856582	0.654206	0.782609
FT_XLM-R	sl	0.7473	0.697495	0.763092
FT_XLM-R	sq	0.798928	0.531915	0.505155
FT_XLM-R	sr	0.666667	0.73057	0.622951
FT_XLM-R	sv	0.812183	0.804348	0.659686
FT_XLM-R	th	0.781362	0.797386	0.810924
FT_XLM-R	ur	0.778947	0.649351	0.595041
FT_XLM-R	zh	0.834959	0.869986	0.626385
FT_XLM-R-dist	ar	0.954125	0.797019	0.575701
FT_XLM-R-dist	bg	0.715232	0.736364	0.766885
FT_XLM-R-dist	bs	0.722772	0.873239	0.662577
FT_XLM-R-dist	cs	0.948802	0.837278	0.457895
FT_XLM-R-dist	de	0.871663	0.899895	0.695421
FT_XLM-R-dist	en	0.969549	0.858474	0.525711
FT_XLM-R-dist	es	0.810863	0.857592	0.635011
FT_XLM-R-dist	fa	0.885246	0.857143	0.550725
FT_XLM-R-dist	fr	0.938224	0.928113	0.461261
FT_XLM-R-dist	he	0.899083	0.820513	0.666667
FT_XLM-R-dist	hi	0.650602	0.57971	0.6875
FT_XLM-R-dist	hr	0.813772	0.730769	0.640569
FT_XLM-R-dist	hu	0.833659	0.755245	0.748201
FT_XLM-R-dist	it	0.882353	0.769231	0.645161
FT_XLM-R-dist	ja	0.924773	0.920779	0.349206
FT_XLM-R-dist	lv	0.8	0.6	0.731707
FT_XLM-R-dist	pl	0.842737	0.849295	0.667401
FT_XLM-R-dist	pt	0.703704	0.584882	0.583884
FT_XLM-R-dist	ru	0.875912	0.845173	0.612006
FT_XLM-R-dist	sk	0.807377	0.702703	0.811321
FT_XLM-R-dist	sl	0.811475	0.766423	0.686093
FT_XLM-R-dist	sq	0.738028	0.71028	0.55
FT_XLM-R-dist	sr	0.721805	0.768844	0.551724
FT_XLM-R-dist	sv	0.818182	0.773234	0.659686
FT_XLM-R-dist	th	0.876033	0.781457	0.652381
FT_XLM-R-dist	ur	0.473684	0.514286	0.75
FT_XLM-R-dist	zh	0.892581	0.880268	0.448237
FT_mBERT	ar	0.934709	0.777184	0.572499
FT_mBERT	bg	0.697987	0.669856	0.769565
FT_mBERT	bs	0.620321	0.834951	0.506849
FT_mBERT	cs	0.855279	0.8	0.589651
FT_mBERT	de	0.798907	0.860262	0.721717
FT_mBERT	en	0.963008	0.802688	0.546951
FT_mBERT	es	0.766733	0.836887	0.673708
FT_mBERT	fa	0.79646	0.608696	0.765432
FT_mBERT	fr	0.871409	0.930173	0.441606
FT_mBERT	he	0.878505	0.878049	0.666667
FT_mBERT	hi	0.712644	0.537313	0.630435
FT_mBERT	hr	0.893431	0.750789	0.465863
FT_mBERT	hu	0.810379	0.641221	0.681818
FT_mBERT	it	0.733333	0.688525	0.746269
FT_mBERT	ja	0.858913	0.915144	0.368627
FT_mBERT	lv	0.285714	0.25	0.869565
FT_mBERT	pl	0.759331	0.844146	0.599537
FT_mBERT	pt	0.536977	0.718294	0.549391
FT_mBERT	ru	0.703158	0.810507	0.789272
FT_mBERT	sk	0.901887	0.725664	0.517647
FT_mBERT	sl	0.702461	0.648	0.741117
FT_mBERT	sq	0.877193	0.466667	0.294118
FT_mBERT	sr	0.612245	0.822115	0.362117
FT_mBERT	sv	0.647399	0.804348	0.652632
FT_mBERT	th	0.776978	0.385965	0.777538
FT_mBERT	ur	0.242424	0.716049	0.835616
FT_mBERT	zh	0.848071	0.899765	0.37619
FT_mT5	ar	0.944647	0.785841	0.582589
FT_mT5	bg	0.768254	0.669856	0.780172
FT_mT5	bs	0.735294	0.80597	0.593548
FT_mT5	cs	0.95393	0.828614	0.396717
FT_mT5	de	0.873975	0.894653	0.71082
FT_mT5	en	0.964894	0.875072	0.525326
FT_mT5	es	0.814272	0.855194	0.666294
FT_mT5	fa	0.827586	0.545455	0.666667
FT_mT5	fr	0.913759	0.935628	0.557432
FT_mT5	he	0.909091	0.647059	0.666667
FT_mT5	hi	0.782609	0.833333	0.5
FT_mT5	hr	0.674825	0.726688	0.574627
FT_mT5	hu	0.877589	0.576	0.567901
FT_mT5	it	0.8125	0.75	0.727273
FT_mT5	ja	0.914921	0.919376	0.412214
FT_mT5	lv	0.83871	0.526316	0.514286
FT_mT5	pl	0.855107	0.806774	0.683351
FT_mT5	pt	0.686869	0.609013	0.564926
FT_mT5	ru	0.892086	0.761719	0.635971
FT_mT5	sk	0.772152	0.588235	0.859729
FT_mT5	sl	0.765957	0.709924	0.633609
FT_mT5	sq	0.705202	0.395349	0.599034
FT_mT5	sr	0.716981	0.822115	0.352941
FT_mT5	sv	0.78125	0.764045	0.713568
FT_mT5	th	0.908507	0.773333	0.609337
FT_mT5	ur	0.696629	0.746988	0.282828
FT_mT5	zh	0.862698	0.905943	0.472564
FT_mUSE-dist	ar	0.946799	0.757246	0.564431
FT_mUSE-dist	bg	0.74026	0.688679	0.742222
FT_mUSE-dist	bs	0.663212	0.873239	0.565789
FT_mUSE-dist	cs	0.88051	0.830357	0.479896
FT_mUSE-dist	de	0.792308	0.914761	0.611582
FT_mUSE-dist	en	0.951609	0.85936	0.482128
FT_mUSE-dist	es	0.797415	0.84428	0.616812
FT_mUSE-dist	fa	0.763636	0.857143	0.412698
FT_mUSE-dist	fr	0.888889	0.918394	0.412639
FT_mUSE-dist	he	0.909091	0.930233	0
FT_mUSE-dist	hi	0.564103	0.657534	0.673684
FT_mUSE-dist	hr	0.695353	0.766355	0.525097
FT_mUSE-dist	hu	0.788618	0.710145	0.671756
FT_mUSE-dist	it	0.830769	0.709677	0.746269
FT_mUSE-dist	ja	0.829922	0.940727	0.214592
FT_mUSE-dist	lv	0.758621	0.6	0.594595
FT_mUSE-dist	pl	0.760129	0.851001	0.605991
FT_mUSE-dist	pt	0.671533	0.622437	0.519337
FT_mUSE-dist	ru	0.826667	0.808271	0.612006
FT_mUSE-dist	sk	0.734783	0.742358	0.770732
FT_mUSE-dist	sl	0.654292	0.790698	0.600846
FT_mUSE-dist	sq	0.613003	0.633663	0.61244
FT_mUSE-dist	sr	0.577406	0.827751	0.419355
FT_mUSE-dist	sv	0.655172	0.833922	0.601093
FT_mUSE-dist	th	0.897893	0.491803	0.602469
FT_mUSE-dist	ur	0.432432	0.683544	0.482143
FT_mUSE-dist	zh	0.864501	0.891418	0.383886
HB_DistilmBERT	ar	0.950521	0.529475	0.536304
HB_DistilmBERT	bg	0.609319	0.472527	0.828157
HB_DistilmBERT	bs	0.670103	0.846154	0.517007
HB_DistilmBERT	cs	0.91573	0.557798	0.306358
HB_DistilmBERT	de	0.809317	0.802065	0.655267
HB_DistilmBERT	en	0.966398	0.709111	0.354792
HB_DistilmBERT	es	0.819162	0.823085	0.531692
HB_DistilmBERT	fa	0.817391	0.222222	0.571429
HB_DistilmBERT	fr	0.845346	0.915584	0.25
HB_DistilmBERT	he	0.878505	0.85	0.666667
HB_DistilmBERT	hi	0.697674	0.46875	0.645161
HB_DistilmBERT	hr	0.78135	0.734824	0.414938
HB_DistilmBERT	hu	0.853846	0.20202	0.701493
HB_DistilmBERT	it	0.711864	0.75	0.764706
HB_DistilmBERT	ja	0.878972	0.824611	0.0560748
HB_DistilmBERT	lv	0.758621	0.25	0.666667
HB_DistilmBERT	pl	0.724024	0.788116	0.562945
HB_DistilmBERT	pt	0.500824	0.653302	0.53951
HB_DistilmBERT	ru	0.713987	0.668067	0.786172
HB_DistilmBERT	sk	0.814664	0.588235	0.727273
HB_DistilmBERT	sl	0.675799	0.600414	0.648501
HB_DistilmBERT	sq	0.811671	0.109589	0.557214
HB_DistilmBERT	sr	0.589212	0.827751	0.329545
HB_DistilmBERT	sv	0.607143	0.817204	0.72
HB_DistilmBERT	th	0.874172	0.103093	0.642686
HB_DistilmBERT	ur	0.651163	0.492754	0.411215
HB_DistilmBERT	zh	0.886125	0.843147	0.21466
HB_LaBSE	ar	0.949872	0.73723	0.393761
HB_LaBSE	bg	0.719472	0.742081	0.736607
HB_LaBSE	bs	0.71	0.77551	0.593548
HB_LaBSE	cs	0.956757	0.828614	0.24024
HB_LaBSE	de	0.871084	0.893482	0.595714
HB_LaBSE	en	0.977418	0.745198	0.369986
HB_LaBSE	es	0.80896	0.858787	0.543346
HB_LaBSE	fa	0.837607	0.666667	0.591549
HB_LaBSE	fr	0.927875	0.925354	0.318898
HB_LaBSE	he	0.928571	0.722222	0.666667
HB_LaBSE	hi	0.782609	0.46875	0.630435
HB_LaBSE	hr	0.761438	0.643836	0.595588
HB_LaBSE	hu	0.750524	0.609375	0.73913
HB_LaBSE	it	0.865672	0.75	0.622951
HB_LaBSE	ja	0.909211	0.880808	0.259414
HB_LaBSE	lv	0.714286	0.6	0.7
HB_LaBSE	pl	0.785894	0.810437	0.662983
HB_LaBSE	pt	0.661765	0.662763	0.529492
HB_LaBSE	ru	0.848598	0.768932	0.60793
HB_LaBSE	sk	0.751073	0.678899	0.776699
HB_LaBSE	sl	0.818737	0.724528	0.584879
HB_LaBSE	sq	0.559486	0.660194	0.705357
HB_LaBSE	sr	0.736059	0.784119	0.423592
HB_LaBSE	sv	0.793814	0.764045	0.687179
HB_LaBSE	th	0.930818	0.704225	0.548718
HB_LaBSE	ur	0.651163	0.322581	0.650794
HB_LaBSE	zh	0.877839	0.879732	0.328431
HB_MPNet	ar	0.949686	0.751024	0.476
HB_MPNet	bg	0.736156	0.742081	0.736607
HB_MPNet	bs	0.747573	0.811881	0.628931
HB_MPNet	cs	0.944779	0.840708	0.396717
HB_MPNet	de	0.86055	0.887587	0.638504
HB_MPNet	en	0.963575	0.831246	0.461455
HB_MPNet	es	0.784851	0.853992	0.611176
HB_MPNet	fa	0.894309	0.72	0.591549
HB_MPNet	fr	0.927178	0.919793	0.376426
HB_MPNet	he	0.918919	0.722222	0.666667
HB_MPNet	hi	0.795699	0.280702	0.58427
HB_MPNet	hr	0.738769	0.653061	0.600733
HB_MPNet	hu	0.739958	0.780822	0.729927
HB_MPNet	it	0.848485	0.75	0.645161
HB_MPNet	ja	0.863605	0.90297	0.384466
HB_MPNet	lv	0.758621	0.6	0.7
HB_MPNet	pl	0.764894	0.793774	0.637387
HB_MPNet	pt	0.655835	0.607317	0.564926
HB_MPNet	ru	0.796875	0.801512	0.554878
HB_MPNet	sk	0.726477	0.588235	0.82243
HB_MPNet	sl	0.771186	0.764168	0.600846
HB_MPNet	sq	0.559486	0.647059	0.669725
HB_MPNet	sr	0.781362	0.762626	0.492308
HB_MPNet	sv	0.806122	0.754717	0.673575
HB_MPNet	th	0.883415	0.781457	0.595533
HB_MPNet	ur	0.585366	0.266667	0.606557
HB_MPNet	zh	0.818631	0.923077	0.385799
HB_XLM-R	ar	0.974797	0.66472	0.513461
HB_XLM-R	bg	0.675768	0.657005	0.865731
HB_XLM-R	bs	0.649215	0.77551	0.654321
HB_XLM-R	cs	0.926585	0.707237	0.624413
HB_XLM-R	de	0.872242	0.858393	0.734063
HB_XLM-R	en	0.973792	0.8022	0.523399
HB_XLM-R	es	0.802445	0.775533	0.733546
HB_XLM-R	fa	0.847458	0.72	0.648649
HB_XLM-R	fr	0.90873	0.89404	0.590759
HB_XLM-R	he	0.888889	0.722222	0.666667
HB_XLM-R	hi	0.634146	0.619718	0.74
HB_XLM-R	hr	0.759411	0.629758	0.691781
HB_XLM-R	hu	0.856046	0.540984	0.761566
HB_XLM-R	it	0.666667	0.545455	0.782609
HB_XLM-R	ja	0.918461	0.93598	0.352475
HB_XLM-R	lv	0.714286	0.352941	0.761905
HB_XLM-R	pl	0.843431	0.852702	0.626561
HB_XLM-R	pt	0.562401	0.541507	0.676543
HB_XLM-R	ru	0.740286	0.703476	0.819427
HB_XLM-R	sk	0.809816	0.725664	0.794258
HB_XLM-R	sl	0.609113	0.527233	0.821853
HB_XLM-R	sq	0.634146	0.317073	0.760684
HB_XLM-R	sr	0.697318	0.775	0.507614
HB_XLM-R	sv	0.755319	0.829787	0.77512
HB_XLM-R	th	0.855219	0.685714	0.750552
HB_XLM-R	ur	0.493506	0.575342	0.682171
HB_XLM-R	zh	0.889578	0.864497	0.460497
HB_XLM-R-dist	ar	0.963525	0.576025	0.445532
HB_XLM-R-dist	bg	0.702341	0.688679	0.674473
HB_XLM-R-dist	bs	0.690355	0.8	0.645963
HB_XLM-R-dist	cs	0.906516	0.81448	0.481865
HB_XLM-R-dist	de	0.864669	0.8864	0.639446
HB_XLM-R-dist	en	0.960957	0.782609	0.499469
HB_XLM-R-dist	es	0.782466	0.828142	0.612791
HB_XLM-R-dist	fa	0.817391	0.72	0.717949
HB_XLM-R-dist	fr	0.899266	0.905636	0.421442
HB_XLM-R-dist	he	0.909091	0.722222	0.666667
HB_XLM-R-dist	hi	0.697674	0.492308	0.568182
HB_XLM-R-dist	hr	0.72605	0.701639	0.673611
HB_XLM-R-dist	hu	0.663677	0.671642	0.73913
HB_XLM-R-dist	it	0.733333	0.769231	0.6875
HB_XLM-R-dist	ja	0.869031	0.870924	0.459259
HB_XLM-R-dist	lv	0.83871	0.6	0.631579
HB_XLM-R-dist	pl	0.752104	0.780488	0.700322
HB_XLM-R-dist	pt	0.655835	0.574282	0.576361
HB_XLM-R-dist	ru	0.78501	0.764133	0.587183
HB_XLM-R-dist	sk	0.668192	0.56	0.827907
HB_XLM-R-dist	sl	0.7473	0.724528	0.668456
HB_XLM-R-dist	sq	0.573248	0.5625	0.705357
HB_XLM-R-dist	sr	0.671875	0.720627	0.537313
HB_XLM-R-dist	sv	0.735135	0.663968	0.693878
HB_XLM-R-dist	th	0.890701	0.637037	0.59204
HB_XLM-R-dist	ur	0.453333	0.666667	0.671875
HB_XLM-R-dist	zh	0.817657	0.89769	0.404678
HB_mBERT	ar	0.959257	0.560336	0.486293
HB_mBERT	bg	0.578755	0.48913	0.874751
HB_mBERT	bs	0.716418	0.817734	0.536913
HB_mBERT	cs	0.903409	0.621053	0.360839
HB_mBERT	de	0.795616	0.832868	0.660763
HB_mBERT	en	0.963637	0.728099	0.401811
HB_mBERT	es	0.809341	0.795806	0.609557
HB_mBERT	fa	0.876033	0.117647	0.571429
HB_mBERT	fr	0.79386	0.930858	0.318898
HB_mBERT	he	0.867925	0.789474	0.666667
HB_mBERT	hi	0.741573	0.46875	0.701031
HB_mBERT	hr	0.791069	0.718447	0.401674
HB_mBERT	hu	0.879699	0.410714	0.635294
HB_mBERT	it	0.733333	0.644068	0.746269
HB_mBERT	ja	0.823279	0.911591	0.104784
HB_mBERT	lv	0.666667	0.25	0.666667
HB_mBERT	pl	0.728232	0.785266	0.664459
HB_mBERT	pt	0.473154	0.664327	0.533516
HB_mBERT	ru	0.716667	0.690083	0.739362
HB_mBERT	sk	0.852071	0.538071	0.720812
HB_mBERT	sl	0.663594	0.609053	0.675567
HB_mBERT	sq	0.76584	0.337349	0.449198
HB_mBERT	sr	0.600823	0.813559	0.329545
HB_mBERT	sv	0.598802	0.745247	0.693878
HB_mBERT	th	0.827586	0.213592	0.674473
HB_mBERT	ur	0.493506	0.776471	0.349515
HB_mBERT	zh	0.858622	0.839702	0.226268
HB_mT5	ar	0.960987	0.717757	0.528389
HB_mT5	bg	0.693603	0.505376	0.840164
HB_mT5	bs	0.747573	0.723404	0.517007
HB_mT5	cs	0.95732	0.713584	0.459921
HB_mT5	de	0.8468	0.865834	0.71082
HB_mT5	en	0.974531	0.822823	0.478858
HB_mT5	es	0.852297	0.781006	0.678848
HB_mT5	fa	0.774775	0.545455	0.765432
HB_mT5	fr	0.920863	0.934949	0.406716
HB_mT5	he	0.918919	0.722222	0.666667
HB_mT5	hi	0.697674	0.727273	0.630435
HB_mT5	hr	0.835637	0.657627	0.496063
HB_mT5	hu	0.860421	0.288462	0.734545
HB_mT5	it	0.793651	0.490566	0.764706
HB_mT5	ja	0.896873	0.919376	0.284536
HB_mT5	lv	0.8	0.6	0.666667
HB_mT5	pl	0.857143	0.80031	0.543923
HB_mT5	pt	0.657817	0.513021	0.620335
HB_mT5	ru	0.649123	0.636559	0.846715
HB_mT5	sk	0.885057	0.552764	0.727273
HB_mT5	sl	0.760684	0.631579	0.680851
HB_mT5	sq	0.874372	0.275	0.415301
HB_mT5	sr	0.697318	0.75	0.432
HB_mT5	sv	0.721311	0.829787	0.673575
HB_mT5	th	0.855219	0.656934	0.730942
HB_mT5	ur	0.711111	0.555556	0.365385
HB_mT5	zh	0.884391	0.902863	0.368421
HB_mUSE-dist	ar	0.961168	0.666018	0.491089
HB_mUSE-dist	bg	0.779874	0.643902	0.665094
HB_mUSE-dist	bs	0.8	0.702703	0.628931
HB_mUSE-dist	cs	0.918768	0.779503	0.431058
HB_mUSE-dist	de	0.855208	0.852117	0.623249
HB_mUSE-dist	en	0.969331	0.745198	0.4673
HB_mUSE-dist	es	0.796248	0.819903	0.608746
HB_mUSE-dist	fa	0.785714	0.608696	0.630137
HB_mUSE-dist	fr	0.909451	0.904918	0.373333
HB_mUSE-dist	he	0.899083	0.647059	0.666667
HB_mUSE-dist	hi	0.617284	0.338983	0.776699
HB_mUSE-dist	hr	0.798732	0.643836	0.56391
HB_mUSE-dist	hu	0.778689	0.661654	0.686792
HB_mUSE-dist	it	0.882353	0.688525	0.6
HB_mUSE-dist	ja	0.84701	0.870156	0.295082
HB_mUSE-dist	lv	0.8	0.6	0.631579
HB_mUSE-dist	pl	0.770408	0.748991	0.710021
HB_mUSE-dist	pt	0.714689	0.558081	0.506964
HB_mUSE-dist	ru	0.896057	0.713996	0.514107
HB_mUSE-dist	sk	0.807377	0.595122	0.707692
HB_mUSE-dist	sl	0.755365	0.648	0.614525
HB_mUSE-dist	sq	0.693878	0.5625	0.535354
HB_mUSE-dist	sr	0.731343	0.737113	0.410811
HB_mUSE-dist	sv	0.78125	0.641975	0.726368
HB_mUSE-dist	th	0.935837	0.516129	0.418994
HB_mUSE-dist	ur	0.696629	0.594595	0.380952
HB_mUSE-dist	zh	0.854516	0.868892	0.358604
HL_DistilmBERT	ar	0.962439	0.305127	0.175287
HL_DistilmBERT	bg	0.435484	0.544503	0.851927
HL_DistilmBERT	bs	0.550562	0.834951	0.620253
HL_DistilmBERT	cs	0.874636	0.295011	0.489691
HL_DistilmBERT	de	0.67988	0.857768	0.604684
HL_DistilmBERT	en	0.974408	0.549581	0.237203
HL_DistilmBERT	es	0.703588	0.787104	0.666294
HL_DistilmBERT	fa	0.961832	0	0.245614
HL_DistilmBERT	fr	0.839662	0.896962	0.147505
HL_DistilmBERT	he	0.956522	0.647059	0.666667
HL_DistilmBERT	hi	0.582278	0.25	0.752475
HL_DistilmBERT	hr	0.433884	0.684385	0.66899
HL_DistilmBERT	hu	0.835938	0.271845	0.696629
HL_DistilmBERT	it	0.793651	0.666667	0.645161
HL_DistilmBERT	ja	0.565744	0.948767	0.0740741
HL_DistilmBERT	lv	0.434783	0	0.844444
HL_DistilmBERT	pl	0.601885	0.86613	0.390957
HL_DistilmBERT	pt	0.425606	0.5725	0.580132
HL_DistilmBERT	ru	0.404145	0.737052	0.741036
HL_DistilmBERT	sk	0.75641	0.451613	0.764706
HL_DistilmBERT	sl	0.347578	0.409412	0.889138
HL_DistilmBERT	sq	0.779292	0.109589	0.605769
HL_DistilmBERT	sr	0.495575	0.836105	0.366667
HL_DistilmBERT	sv	0.546584	0.829787	0.561798
HL_DistilmBERT	th	0.843537	0.0631579	0.665094
HL_DistilmBERT	ur	0.410959	0.447761	0.425926
HL_DistilmBERT	zh	0.67007	0.924563	0.195767
HL_LaBSE	ar	0.914855	0.628	0.461228
HL_LaBSE	bg	0.689189	0.753363	0.764192
HL_LaBSE	bs	0.729064	0.8	0.654321
HL_LaBSE	cs	0.933702	0.830357	0.435247
HL_LaBSE	de	0.813175	0.902208	0.632823
HL_LaBSE	en	0.968397	0.763407	0.355271
HL_LaBSE	es	0.77807	0.846723	0.638128
HL_LaBSE	fa	0.807018	0.769231	0.550725
HL_LaBSE	fr	0.90873	0.930173	0.360845
HL_LaBSE	he	0.888889	0.756757	0.666667
HL_LaBSE	hi	0.666667	0.280702	0.776699
HL_LaBSE	hr	0.690846	0.68	0.691781
HL_LaBSE	hu	0.701525	0.641221	0.765957
HL_LaBSE	it	0.865672	0.769231	0.645161
HL_LaBSE	ja	0.853389	0.892738	0.439024
HL_LaBSE	lv	0.615385	0.6	0.818182
HL_LaBSE	pl	0.740692	0.826646	0.646532
HL_LaBSE	pt	0.627451	0.646919	0.563003
HL_LaBSE	ru	0.750507	0.780769	0.639885
HL_LaBSE	sk	0.624113	0.690909	0.849315
HL_LaBSE	sl	0.719647	0.677104	0.741117
HL_LaBSE	sq	0.439024	0.685714	0.716814
HL_LaBSE	sr	0.712121	0.790123	0.472727
HL_LaBSE	sv	0.768421	0.636364	0.700508
HL_LaBSE	th	0.807018	0.606061	0.701835
HL_LaBSE	ur	0.512821	0.514286	0.534483
HL_LaBSE	zh	0.821546	0.899765	0.381969
HL_MPNet	ar	0.944553	0.644938	0.285329
HL_MPNet	bg	0.719472	0.694836	0.785408
HL_MPNet	bs	0.690355	0.781726	0.747126
HL_MPNet	cs	0.962923	0.81448	0.358543
HL_MPNet	de	0.864083	0.829596	0.696286
HL_MPNet	en	0.973915	0.77907	0.465217
HL_MPNet	es	0.776463	0.808301	0.69045
HL_MPNet	fa	0.903226	0.769231	0.630137
HL_MPNet	fr	0.93273	0.893307	0.461261
HL_MPNet	he	0.899083	0.685714	0.666667
HL_MPNet	hi	0.682353	0.185185	0.811321
HL_MPNet	hr	0.665493	0.570397	0.767742
HL_MPNet	hu	0.636156	0.630769	0.832215
HL_MPNet	it	0.830769	0.75	0.727273
HL_MPNet	ja	0.907053	0.838574	0.490018
HL_MPNet	lv	0.83871	0.444444	0.514286
HL_MPNet	pl	0.698177	0.707256	0.746114
HL_MPNet	pt	0.671533	0.509138	0.593176
HL_MPNet	ru	0.770459	0.744554	0.628075
HL_MPNet	sk	0.68623	0.451613	0.869955
HL_MPNet	sl	0.711111	0.591667	0.800484
HL_MPNet	sq	0.47619	0.660194	0.79668
HL_MPNet	sr	0.745387	0.672087	0.576271
HL_MPNet	sv	0.78125	0.558952	0.75122
HL_MPNet	th	0.977444	0.695035	0.354651
HL_MPNet	ur	0.388889	0.266667	0.671875
HL_MPNet	zh	0.853141	0.903891	0.400938
HL_XLM-R	ar	0.934709	0.328867	0.50471
HL_XLM-R	bg	0.519084	0.429379	0.917782
HL_XLM-R	bs	0.612903	0.756477	0.725146
HL_XLM-R	cs	0.889528	0.516981	0.745182
HL_XLM-R	de	0.844982	0.848318	0.717547
HL_XLM-R	en	0.984323	0.661812	0.321046
HL_XLM-R	es	0.76016	0.757403	0.727467
HL_XLM-R	fa	0.876033	0.315789	0.550725
HL_XLM-R	fr	0.907285	0.923969	0.394737
HL_XLM-R	he	0.909091	0.647059	0.666667
HL_XLM-R	hi	0.582278	0.444444	0.788462
HL_XLM-R	hr	0.513725	0.570397	0.80625
HL_XLM-R	hu	0.840467	0.452174	0.711111
HL_XLM-R	it	0.566038	0.769231	0.782609
HL_XLM-R	ja	0.900531	0.907298	0.358974
HL_XLM-R	lv	0.363636	0.444444	0.869565
HL_XLM-R	pl	0.800249	0.794712	0.588098
HL_XLM-R	pt	0.529887	0.467114	0.689487
HL_XLM-R	ru	0.689362	0.591111	0.784615
HL_XLM-R	sk	0.652778	0.641509	0.833333
HL_XLM-R	sl	0.423913	0.527233	0.917031
HL_XLM-R	sq	0.650602	0.184211	0.744589
HL_XLM-R	sr	0.617886	0.77193	0.565854
HL_XLM-R	sv	0.639535	0.690476	0.825688
HL_XLM-R	th	0.857143	0.539683	0.733781
HL_XLM-R	ur	0.473684	0.492754	0.740741
HL_XLM-R	zh	0.856801	0.860068	0.463964
HL_XLM-R-dist	ar	0.971067	0.474708	0.189163
HL_XLM-R-dist	bg	0.710963	0.712963	0.722348
HL_XLM-R-dist	bs	0.8	0.736842	0.670732
HL_XLM-R-dist	cs	0.962923	0.762205	0.335227
HL_XLM-R-dist	de	0.899349	0.843213	0.591691
HL_XLM-R-dist	en	0.972185	0.752387	0.383977
HL_XLM-R-dist	es	0.813516	0.80765	0.600587
HL_XLM-R-dist	fa	0.912	0.608696	0.412698
HL_XLM-R-dist	fr	0.939589	0.882195	0.370229
HL_XLM-R-dist	he	0.928571	0.756757	0
HL_XLM-R-dist	hi	0.727273	0.6	0.568182
HL_XLM-R-dist	hr	0.730318	0.600707	0.682759
HL_XLM-R-dist	hu	0.709957	0.587302	0.783217
HL_XLM-R-dist	it	0.830769	0.730159	0.6
HL_XLM-R-dist	ja	0.905611	0.85221	0.453532
HL_XLM-R-dist	lv	0.875	0.526316	0.470588
HL_XLM-R-dist	pl	0.788184	0.747981	0.597914
HL_XLM-R-dist	pt	0.746556	0.532134	0.490141
HL_XLM-R-dist	ru	0.826667	0.749507	0.435644
HL_XLM-R-dist	sk	0.720879	0.552764	0.811321
HL_XLM-R-dist	sl	0.784067	0.661386	0.657645
HL_XLM-R-dist	sq	0.573248	0.57732	0.687783
HL_XLM-R-dist	sr	0.798587	0.682796	0.496164
HL_XLM-R-dist	sv	0.835821	0.669355	0.623656
HL_XLM-R-dist	th	0.968134	0.626866	0.368876
HL_XLM-R-dist	ur	0.619048	0.492754	0.468468
HL_XLM-R-dist	zh	0.883087	0.852797	0.39718
HL_mBERT	ar	0.952465	0.337977	0.201982
HL_mBERT	bg	0.416327	0.536842	0.896686
HL_mBERT	bs	0.508671	0.846154	0.662577
HL_mBERT	cs	0.852556	0.601423	0.479896
HL_mBERT	de	0.664642	0.883422	0.612562
HL_mBERT	en	0.965082	0.647343	0.279622
HL_mBERT	es	0.745534	0.839979	0.558308
HL_mBERT	fa	0.894309	0.222222	0.484848
HL_mBERT	fr	0.755656	0.940355	0.147505
HL_mBERT	he	0.878505	0.878049	0.666667
HL_mBERT	hi	0.727273	0.393443	0.776699
HL_mBERT	hr	0.456212	0.742857	0.709459
HL_mBERT	hu	0.760915	0.452174	0.691729
HL_mBERT	it	0.754098	0.80597	0.551724
HL_mBERT	ja	0.706708	0.938697	0.0917431
HL_mBERT	lv	0.2	0.727273	0.631579
HL_mBERT	pl	0.665744	0.86613	0.436693
HL_mBERT	pt	0.422877	0.633971	0.545455
HL_mBERT	ru	0.54717	0.684647	0.718919
HL_mBERT	sk	0.715232	0.702703	0.630435
HL_mBERT	sl	0.370787	0.507726	0.821853
HL_mBERT	sq	0.723647	0.296296	0.557214
HL_mBERT	sr	0.440367	0.833333	0.415094
HL_mBERT	sv	0.480519	0.759398	0.666667
HL_mBERT	th	0.3	0.0833333	0.907336
HL_mBERT	ur	0.215385	0.776471	0.425926
HL_mBERT	zh	0.729047	0.913064	0.246787
HL_mT5	ar	0.96262	0.430206	0.249885
HL_mT5	bg	0.557621	0.513369	0.898833
HL_mT5	bs	0.566667	0.781726	0.645963
HL_mT5	cs	0.952794	0.663265	0.475943
HL_mT5	de	0.801527	0.851485	0.708279
HL_mT5	en	0.984837	0.603657	0.322044
HL_mT5	es	0.735304	0.781686	0.71444
HL_mT5	fa	0.866667	0.545455	0.507463
HL_mT5	fr	0.876022	0.929487	0.409683
HL_mT5	he	0.918919	0.722222	0.666667
HL_mT5	hi	0.617284	0.366667	0.701031
HL_mT5	hr	0.390658	0.615385	0.726667
HL_mT5	hu	0.734607	0.396396	0.761566
HL_mT5	it	0.642857	0.730159	0.6875
HL_mT5	ja	0.819088	0.927742	0.229787
HL_mT5	lv	0.83871	0.526316	0.594595
HL_mT5	pl	0.735738	0.75502	0.584795
HL_mT5	pt	0.532258	0.568922	0.589474
HL_mT5	ru	0.637168	0.668067	0.752632
HL_mT5	sk	0.534005	0.4	0.88
HL_mT5	sl	0.581907	0.558635	0.803378
HL_mT5	sq	0.449827	0.395349	0.849206
HL_mT5	sr	0.634538	0.77193	0.464752
HL_mT5	sv	0.677966	0.768657	0.666667
HL_mT5	th	0.894309	0.676259	0.602469
HL_mT5	ur	0.60241	0.613333	0.396226
HL_mT5	zh	0.831635	0.903377	0.338611
HL_mUSE-dist	ar	0.965061	0.510315	0.260274
HL_mUSE-dist	bg	0.744337	0.643902	0.813417
HL_mUSE-dist	bs	0.753623	0.695652	0.725146
HL_mUSE-dist	cs	0.936639	0.715686	0.325714
HL_mUSE-dist	de	0.855208	0.838063	0.628053
HL_mUSE-dist	en	0.976714	0.652921	0.367158
HL_mUSE-dist	es	0.793517	0.795141	0.640456
HL_mUSE-dist	fa	0.827586	0.608696	0.305085
HL_mUSE-dist	fr	0.910891	0.88369	0.348162
HL_mUSE-dist	he	0.928571	0.5625	0.666667
HL_mUSE-dist	hi	0.666667	0.115385	0.833333
HL_mUSE-dist	hr	0.713073	0.511278	0.70068
HL_mUSE-dist	hu	0.709957	0.504202	0.795848
HL_mUSE-dist	it	0.8125	0.688525	0.6875
HL_mUSE-dist	ja	0.866712	0.848233	0.263048
HL_mUSE-dist	lv	0.758621	0.444444	0.594595
HL_mUSE-dist	pl	0.753717	0.67408	0.722281
HL_mUSE-dist	pt	0.694405	0.4834	0.625641
HL_mUSE-dist	ru	0.810811	0.687371	0.60177
HL_mUSE-dist	sk	0.709534	0.492147	0.827907
HL_mUSE-dist	sl	0.72807	0.514286	0.764633
HL_mUSE-dist	sq	0.47619	0.376471	0.771186
HL_mUSE-dist	sr	0.759124	0.631285	0.540943
HL_mUSE-dist	sv	0.78125	0.526786	0.738916
HL_mUSE-dist	th	0.917197	0.466667	0.440771
HL_mUSE-dist	ur	0.585366	0.424242	0.440367
HL_mUSE-dist	zh	0.879593	0.835657	0.282116

## Sheet: Pivot Table
		model_experiment
lang		FT_DistilmBERT	FT_LaBSE	FT_mBERT	FT_MPNet	FT_mT5	FT_mUSE-dist	FT_XLM-R	FT_XLM-R-dist	HB_DistilmBERT	HB_LaBSE	HB_mBERT	HB_MPNet	HB_mT5	HB_mUSE-dist	HB_XLM-R	HB_XLM-R-dist	HL_DistilmBERT	HL_LaBSE	HL_mBERT	HL_MPNet	HL_mT5	HL_mUSE-dist	HL_XLM-R	HL_XLM-R-dist
ar	f1_pos	0.947079	0.954125	0.934709	0.953203	0.944647	0.946799	0.906463	0.954125	0.950521	0.949872	0.959257	0.949686	0.960987	0.961168	0.974797	0.963525	0.962439	0.914855	0.952465	0.944553	0.96262	0.965061	0.934709	0.971067	0.950781
	f1_neu	0.531792	0.584169	0.572499	0.571964	0.582589	0.564431	0.708912	0.575701	0.536304	0.393761	0.486293	0.476	0.528389	0.491089	0.513461	0.445532	0.175287	0.461228	0.201982	0.285329	0.249885	0.260274	0.50471	0.189163	0.453781
	f1_neg	0.75612	0.807475	0.777184	0.809544	0.785841	0.757246	0.785841	0.797019	0.529475	0.73723	0.560336	0.751024	0.717757	0.666018	0.66472	0.576025	0.305127	0.628	0.337977	0.644938	0.430206	0.510315	0.328867	0.474708	0.630791
bg	f1_pos	0.648084	0.744337	0.697987	0.752412	0.768254	0.74026	0.764331	0.715232	0.609319	0.719472	0.578755	0.736156	0.693603	0.779874	0.675768	0.702341	0.435484	0.689189	0.416327	0.719472	0.557621	0.744337	0.519084	0.710963	0.671611
	f1_neu	0.772234	0.753304	0.769565	0.753304	0.780172	0.742222	0.805907	0.766885	0.828157	0.736607	0.874751	0.736607	0.840164	0.665094	0.865731	0.674473	0.851927	0.764192	0.896686	0.785408	0.898833	0.813417	0.917782	0.722348	0.792324
	f1_neg	0.588832	0.811966	0.669856	0.764444	0.669856	0.688679	0.688679	0.736364	0.472527	0.742081	0.48913	0.742081	0.505376	0.643902	0.657005	0.688679	0.544503	0.753363	0.536842	0.694836	0.513369	0.643902	0.429379	0.712963	0.641192
bs	f1_pos	0.670103	0.71	0.620321	0.741463	0.735294	0.663212	0.683673	0.722772	0.670103	0.71	0.716418	0.747573	0.747573	0.8	0.649215	0.690355	0.550562	0.729064	0.508671	0.690355	0.566667	0.753623	0.612903	0.8	0.68708
	f1_neu	0.593548	0.620253	0.506849	0.645963	0.593548	0.565789	0.686747	0.662577	0.517007	0.593548	0.536913	0.628931	0.517007	0.628931	0.654321	0.645963	0.620253	0.654321	0.662577	0.747126	0.645963	0.725146	0.725146	0.670732	0.627048
	f1_neg	0.811881	0.899083	0.834951	0.894009	0.80597	0.873239	0.77551	0.873239	0.846154	0.77551	0.817734	0.811881	0.723404	0.702703	0.77551	0.8	0.834951	0.8	0.846154	0.781726	0.781726	0.695652	0.756477	0.736842	0.802263
cs	f1_pos	0.845694	0.942466	0.855279	0.956193	0.95393	0.88051	0.949946	0.948802	0.91573	0.956757	0.903409	0.944779	0.95732	0.918768	0.926585	0.906516	0.874636	0.933702	0.852556	0.962923	0.952794	0.936639	0.889528	0.962923	0.922016
	f1_neu	0.622797	0.535	0.589651	0.431058	0.396717	0.479896	0.589651	0.457895	0.306358	0.24024	0.360839	0.396717	0.459921	0.431058	0.624413	0.481865	0.489691	0.435247	0.479896	0.358543	0.475943	0.325714	0.745182	0.335227	0.460397
	f1_neg	0.696517	0.816265	0.8	0.844118	0.828614	0.830357	0.781395	0.837278	0.557798	0.828614	0.621053	0.840708	0.713584	0.779503	0.707237	0.81448	0.295011	0.830357	0.601423	0.81448	0.663265	0.715686	0.516981	0.762205	0.729039
de	f1_pos	0.749004	0.898798	0.798907	0.888777	0.873975	0.792308	0.879143	0.871663	0.809317	0.871084	0.795616	0.86055	0.8468	0.855208	0.872242	0.864669	0.67988	0.813175	0.664642	0.864083	0.801527	0.855208	0.844982	0.899349	0.831288
	f1_neu	0.692819	0.685829	0.721717	0.674309	0.71082	0.611582	0.770482	0.695421	0.655267	0.595714	0.660763	0.638504	0.71082	0.623249	0.734063	0.639446	0.604684	0.632823	0.612562	0.696286	0.708279	0.628053	0.717547	0.591691	0.667197
	f1_neg	0.881628	0.906234	0.860262	0.904512	0.894653	0.914761	0.8646	0.899895	0.802065	0.893482	0.832868	0.887587	0.865834	0.852117	0.858393	0.8864	0.857768	0.902208	0.883422	0.829596	0.851485	0.838063	0.848318	0.843213	0.86914
en	f1_pos	0.959278	0.974347	0.963008	0.97373	0.964894	0.951609	0.956001	0.969549	0.966398	0.977418	0.963637	0.963575	0.974531	0.969331	0.973792	0.960957	0.974408	0.968397	0.965082	0.973915	0.984837	0.976714	0.984323	0.972185	0.969247
	f1_neu	0.557344	0.524556	0.546951	0.531079	0.525326	0.482128	0.701908	0.525711	0.354792	0.369986	0.401811	0.461455	0.478858	0.4673	0.523399	0.499469	0.237203	0.355271	0.279622	0.465217	0.322044	0.367158	0.321046	0.383977	0.44515
	f1_neg	0.791367	0.87421	0.802688	0.873131	0.875072	0.85936	0.814755	0.858474	0.709111	0.745198	0.728099	0.831246	0.822823	0.745198	0.8022	0.782609	0.549581	0.763407	0.647343	0.77907	0.603657	0.652921	0.661812	0.752387	0.763572
es	f1_pos	0.76755	0.877902	0.766733	0.830295	0.814272	0.797415	0.812001	0.810863	0.819162	0.80896	0.809341	0.784851	0.852297	0.796248	0.802445	0.782466	0.703588	0.77807	0.745534	0.776463	0.735304	0.793517	0.76016	0.813516	0.79329
	f1_neu	0.652739	0.566967	0.673708	0.620012	0.666294	0.616812	0.700436	0.635011	0.531692	0.543346	0.609557	0.611176	0.678848	0.608746	0.733546	0.612791	0.666294	0.638128	0.558308	0.69045	0.71444	0.640456	0.727467	0.600587	0.637409
	f1_neg	0.841211	0.843054	0.836887	0.862949	0.855194	0.84428	0.829399	0.857592	0.823085	0.858787	0.795806	0.853992	0.781006	0.819903	0.775533	0.828142	0.787104	0.846723	0.839979	0.808301	0.781686	0.795141	0.757403	0.80765	0.822117
fa	f1_pos	0.79646	0.866667	0.79646	0.903226	0.827586	0.763636	0.866667	0.885246	0.817391	0.837607	0.876033	0.894309	0.774775	0.785714	0.847458	0.817391	0.961832	0.807018	0.894309	0.903226	0.866667	0.827586	0.876033	0.912	0.850221
	f1_neu	0.701299	0.734177	0.765432	0.630137	0.666667	0.412698	0.765432	0.550725	0.571429	0.591549	0.571429	0.591549	0.765432	0.630137	0.648649	0.717949	0.245614	0.550725	0.484848	0.630137	0.507463	0.305085	0.550725	0.412698	0.583416
	f1_neg	0.608696	0.769231	0.608696	0.814815	0.545455	0.857143	0.666667	0.857143	0.222222	0.666667	0.117647	0.72	0.545455	0.608696	0.72	0.72	0	0.769231	0.222222	0.769231	0.545455	0.608696	0.315789	0.608696	0.57866
fr	f1_pos	0.857341	0.939589	0.871409	0.951049	0.913759	0.888889	0.883627	0.938224	0.845346	0.927875	0.79386	0.927178	0.920863	0.909451	0.90873	0.899266	0.839662	0.90873	0.755656	0.93273	0.876022	0.910891	0.907285	0.939589	0.893626
	f1_neu	0.412639	0.504378	0.441606	0.452899	0.557432	0.412639	0.680062	0.461261	0.25	0.318898	0.318898	0.376426	0.406716	0.373333	0.590759	0.421442	0.147505	0.360845	0.147505	0.461261	0.409683	0.348162	0.394737	0.370229	0.400805
	f1_neg	0.933589	0.938334	0.930173	0.919793	0.935628	0.918394	0.891102	0.928113	0.915584	0.925354	0.930858	0.919793	0.934949	0.904918	0.89404	0.905636	0.896962	0.930173	0.940355	0.893307	0.929487	0.88369	0.923969	0.882195	0.916933
he	f1_pos	0.899083	0.899083	0.878505	0.899083	0.909091	0.909091	0.899083	0.899083	0.878505	0.928571	0.867925	0.918919	0.918919	0.899083	0.888889	0.909091	0.956522	0.888889	0.878505	0.899083	0.918919	0.928571	0.909091	0.928571	0.90459
	f1_neu	0.666667	0.666667	0.666667	0.666667	0.666667	0	0.666667	0.666667	0.666667	0.666667	0.666667	0.666667	0.666667	0.666667	0.666667	0.666667	0.666667	0.666667	0.666667	0.666667	0.666667	0.666667	0.666667	0	0.611111
	f1_neg	0.820513	0.789474	0.878049	0.904762	0.647059	0.930233	0.820513	0.820513	0.85	0.722222	0.789474	0.722222	0.722222	0.647059	0.722222	0.722222	0.647059	0.756757	0.878049	0.685714	0.722222	0.5625	0.647059	0.756757	0.75687
hi	f1_pos	0.821053	0.712644	0.712644	0.682353	0.782609	0.564103	0.755556	0.650602	0.697674	0.782609	0.741573	0.795699	0.697674	0.617284	0.634146	0.697674	0.582278	0.666667	0.727273	0.682353	0.617284	0.666667	0.582278	0.727273	0.691582
	f1_neu	0.534884	0.701031	0.630435	0.6	0.5	0.673684	0.551724	0.6875	0.645161	0.630435	0.701031	0.58427	0.630435	0.776699	0.74	0.568182	0.752475	0.776699	0.776699	0.811321	0.701031	0.833333	0.788462	0.568182	0.673486
	f1_neg	0.675676	0.515152	0.537313	0.74359	0.833333	0.657534	0.74359	0.57971	0.46875	0.46875	0.46875	0.280702	0.727273	0.338983	0.619718	0.492308	0.25	0.280702	0.393443	0.185185	0.366667	0.115385	0.444444	0.6	0.491123
hr	f1_pos	0.863568	0.865269	0.893431	0.802528	0.674825	0.695353	0.840979	0.813772	0.78135	0.761438	0.791069	0.738769	0.835637	0.798732	0.759411	0.72605	0.433884	0.690846	0.456212	0.665493	0.390658	0.713073	0.513725	0.730318	0.718183
	f1_neu	0.472	0.574627	0.465863	0.585185	0.574627	0.525097	0.673611	0.640569	0.414938	0.595588	0.401674	0.600733	0.496063	0.56391	0.691781	0.673611	0.66899	0.691781	0.709459	0.767742	0.726667	0.70068	0.80625	0.682759	0.612675
	f1_neg	0.734824	0.726688	0.750789	0.730769	0.726688	0.766355	0.590747	0.730769	0.734824	0.643836	0.718447	0.653061	0.657627	0.643836	0.629758	0.701639	0.684385	0.68	0.742857	0.570397	0.615385	0.511278	0.570397	0.600707	0.671503
hu	f1_pos	0.873346	0.86907	0.810379	0.842718	0.877589	0.788618	0.849421	0.833659	0.853846	0.750524	0.879699	0.739958	0.860421	0.778689	0.856046	0.663677	0.835938	0.701525	0.760915	0.636156	0.734607	0.709957	0.840467	0.709957	0.794049
	f1_neu	0.651163	0.73913	0.681818	0.729927	0.567901	0.671756	0.774648	0.748201	0.701493	0.73913	0.635294	0.729927	0.734545	0.686792	0.761566	0.73913	0.696629	0.765957	0.691729	0.832215	0.761566	0.795848	0.711111	0.783217	0.722112
	f1_neg	0.564516	0.728571	0.641221	0.828947	0.576	0.710145	0.641221	0.755245	0.20202	0.609375	0.410714	0.780822	0.288462	0.661654	0.540984	0.671642	0.271845	0.641221	0.452174	0.630769	0.396396	0.504202	0.452174	0.587302	0.564484
it	f1_pos	0.754098	0.898551	0.733333	0.865672	0.8125	0.830769	0.793651	0.882353	0.711864	0.865672	0.733333	0.848485	0.793651	0.882353	0.666667	0.733333	0.793651	0.865672	0.754098	0.830769	0.642857	0.8125	0.566038	0.830769	0.78761
	f1_neu	0.746269	0.622951	0.746269	0.645161	0.727273	0.746269	0.6875	0.645161	0.764706	0.622951	0.746269	0.645161	0.764706	0.6	0.782609	0.6875	0.645161	0.645161	0.551724	0.727273	0.6875	0.6875	0.782609	0.6	0.68782
	f1_neg	0.709677	0.787879	0.688525	0.769231	0.75	0.709677	0.787879	0.769231	0.75	0.75	0.644068	0.75	0.490566	0.688525	0.545455	0.769231	0.666667	0.769231	0.80597	0.75	0.730159	0.688525	0.769231	0.730159	0.719578
ja	f1_pos	0.894667	0.940575	0.858913	0.924075	0.914921	0.829922	0.851005	0.924773	0.878972	0.909211	0.823279	0.863605	0.896873	0.84701	0.918461	0.869031	0.565744	0.853389	0.706708	0.907053	0.819088	0.866712	0.900531	0.905611	0.861255
	f1_neu	0.248421	0.384466	0.368627	0.332665	0.412214	0.214592	0.681458	0.349206	0.0560748	0.259414	0.104784	0.384466	0.284536	0.295082	0.352475	0.459259	0.0740741	0.439024	0.0917431	0.490018	0.229787	0.263048	0.358974	0.453532	0.316164
	f1_neg	0.896414	0.915851	0.915144	0.924272	0.919376	0.940727	0.88755	0.920779	0.824611	0.880808	0.911591	0.90297	0.919376	0.870156	0.93598	0.870924	0.948767	0.892738	0.938697	0.838574	0.927742	0.848233	0.907298	0.85221	0.899616
lv	f1_pos	0.5	0.83871	0.285714	0.875	0.83871	0.758621	0.83871	0.8	0.758621	0.714286	0.666667	0.758621	0.8	0.8	0.714286	0.83871	0.434783	0.615385	0.2	0.83871	0.83871	0.758621	0.363636	0.875	0.696312
	f1_neu	0.869565	0.818182	0.869565	0.731707	0.514286	0.594595	0.844444	0.731707	0.666667	0.7	0.666667	0.7	0.666667	0.631579	0.761905	0.631579	0.844444	0.818182	0.631579	0.514286	0.594595	0.594595	0.869565	0.470588	0.697373
	f1_neg	0.133333	0.6	0.25	0.6	0.526316	0.6	0.666667	0.6	0.25	0.6	0.25	0.6	0.6	0.6	0.352941	0.6	0	0.6	0.727273	0.444444	0.526316	0.444444	0.444444	0.526316	0.480937
pl	f1_pos	0.775095	0.859846	0.759331	0.839253	0.855107	0.760129	0.893861	0.842737	0.724024	0.785894	0.728232	0.764894	0.857143	0.770408	0.843431	0.752104	0.601885	0.740692	0.665744	0.698177	0.735738	0.753717	0.800249	0.788184	0.774828
	f1_neu	0.576471	0.687636	0.599537	0.660022	0.683351	0.605991	0.690476	0.667401	0.562945	0.662983	0.664459	0.637387	0.543923	0.710021	0.626561	0.700322	0.390957	0.646532	0.436693	0.746114	0.584795	0.722281	0.588098	0.597914	0.624703
	f1_neg	0.820396	0.850148	0.844146	0.852702	0.806774	0.851001	0.802164	0.849295	0.788116	0.810437	0.785266	0.793774	0.80031	0.748991	0.852702	0.780488	0.86613	0.826646	0.86613	0.707256	0.75502	0.67408	0.794712	0.747981	0.803111
pt	f1_pos	0.475712	0.667643	0.536977	0.669591	0.686869	0.671533	0.705548	0.703704	0.500824	0.661765	0.473154	0.655835	0.657817	0.714689	0.562401	0.655835	0.425606	0.627451	0.422877	0.671533	0.532258	0.694405	0.529887	0.746556	0.610436
	f1_neu	0.55914	0.432749	0.549391	0.545455	0.564926	0.519337	0.547425	0.583884	0.53951	0.529492	0.533516	0.564926	0.620335	0.506964	0.676543	0.576361	0.580132	0.563003	0.545455	0.593176	0.589474	0.625641	0.689487	0.490141	0.563603
	f1_neg	0.703746	0.694857	0.718294	0.60049	0.609013	0.622437	0.590123	0.584882	0.653302	0.662763	0.664327	0.607317	0.513021	0.558081	0.541507	0.574282	0.5725	0.646919	0.633971	0.509138	0.568922	0.4834	0.467114	0.532134	0.596356
ru	f1_pos	0.760563	0.859259	0.703158	0.9	0.892086	0.826667	0.901961	0.875912	0.713987	0.848598	0.716667	0.796875	0.649123	0.896057	0.740286	0.78501	0.404145	0.750507	0.54717	0.770459	0.637168	0.810811	0.689362	0.826667	0.762604
	f1_neu	0.729223	0.710204	0.789272	0.570136	0.635971	0.612006	0.730924	0.612006	0.786172	0.60793	0.739362	0.554878	0.846715	0.514107	0.819427	0.587183	0.741036	0.639885	0.718919	0.628075	0.752632	0.60177	0.784615	0.435644	0.672837
	f1_neg	0.808271	0.845173	0.810507	0.861759	0.761719	0.808271	0.785441	0.845173	0.668067	0.768932	0.690083	0.801512	0.636559	0.713996	0.703476	0.764133	0.737052	0.780769	0.684647	0.744554	0.668067	0.687371	0.591111	0.749507	0.746506
sk	f1_pos	0.882917	0.814664	0.901887	0.809816	0.772152	0.734783	0.856582	0.807377	0.814664	0.751073	0.852071	0.726477	0.885057	0.807377	0.809816	0.668192	0.75641	0.624113	0.715232	0.68623	0.534005	0.709534	0.652778	0.720879	0.762254
	f1_neu	0.645161	0.788462	0.517647	0.827907	0.859729	0.770732	0.782609	0.811321	0.727273	0.776699	0.720812	0.82243	0.727273	0.707692	0.794258	0.827907	0.764706	0.849315	0.630435	0.869955	0.88	0.827907	0.833333	0.811321	0.773953
	f1_neg	0.690909	0.758621	0.725664	0.678899	0.588235	0.742358	0.654206	0.702703	0.588235	0.678899	0.538071	0.588235	0.552764	0.595122	0.725664	0.56	0.451613	0.690909	0.702703	0.451613	0.4	0.492147	0.641509	0.552764	0.61466
sl	f1_pos	0.564356	0.765957	0.702461	0.763326	0.765957	0.654292	0.7473	0.811475	0.675799	0.818737	0.663594	0.771186	0.760684	0.755365	0.609113	0.7473	0.347578	0.719647	0.370787	0.711111	0.581907	0.72807	0.423913	0.784067	0.676833
	f1_neu	0.842474	0.68435	0.741117	0.711688	0.633609	0.600846	0.763092	0.686093	0.648501	0.584879	0.675567	0.600846	0.680851	0.614525	0.821853	0.668456	0.889138	0.741117	0.821853	0.800484	0.803378	0.764633	0.917031	0.657645	0.723084
	f1_neg	0.46712	0.790698	0.648	0.781982	0.709924	0.790698	0.697495	0.766423	0.600414	0.724528	0.609053	0.764168	0.631579	0.648	0.527233	0.724528	0.409412	0.677104	0.507726	0.591667	0.558635	0.514286	0.527233	0.661386	0.638721
sq	f1_pos	0.915254	0.682353	0.877193	0.708934	0.705202	0.613003	0.798928	0.738028	0.811671	0.559486	0.76584	0.559486	0.874372	0.693878	0.634146	0.573248	0.779292	0.439024	0.723647	0.47619	0.449827	0.47619	0.650602	0.573248	0.66996
	f1_neu	0.313953	0.578431	0.294118	0.605769	0.599034	0.61244	0.505155	0.55	0.557214	0.705357	0.449198	0.669725	0.415301	0.535354	0.760684	0.705357	0.605769	0.716814	0.557214	0.79668	0.849206	0.771186	0.744589	0.687783	0.607764
	f1_neg	0.296296	0.722222	0.466667	0.789474	0.395349	0.633663	0.531915	0.71028	0.109589	0.660194	0.337349	0.647059	0.275	0.5625	0.317073	0.5625	0.109589	0.685714	0.296296	0.660194	0.395349	0.376471	0.184211	0.57732	0.470928
sr	f1_pos	0.540773	0.716981	0.612245	0.731343	0.716981	0.577406	0.666667	0.721805	0.589212	0.736059	0.600823	0.781362	0.697318	0.731343	0.697318	0.671875	0.495575	0.712121	0.440367	0.745387	0.634538	0.759124	0.617886	0.798587	0.666379
	f1_neu	0.406504	0.496164	0.362117	0.522613	0.352941	0.419355	0.622951	0.551724	0.329545	0.423592	0.329545	0.492308	0.432	0.410811	0.507614	0.537313	0.366667	0.472727	0.415094	0.576271	0.464752	0.540943	0.565854	0.496164	0.462315
	f1_neg	0.819277	0.813559	0.822115	0.765743	0.822115	0.827751	0.73057	0.768844	0.827751	0.784119	0.813559	0.762626	0.75	0.737113	0.775	0.720627	0.836105	0.790123	0.833333	0.672087	0.77193	0.631285	0.77193	0.682796	0.772098
sv	f1_pos	0.677966	0.812183	0.647399	0.8	0.78125	0.655172	0.812183	0.818182	0.607143	0.793814	0.598802	0.806122	0.721311	0.78125	0.755319	0.735135	0.546584	0.768421	0.480519	0.78125	0.677966	0.78125	0.639535	0.835821	0.721441
	f1_neu	0.608696	0.673575	0.652632	0.707071	0.713568	0.601093	0.659686	0.659686	0.72	0.687179	0.693878	0.673575	0.673575	0.726368	0.77512	0.693878	0.561798	0.700508	0.666667	0.75122	0.666667	0.738916	0.825688	0.623656	0.685612
	f1_neg	0.817204	0.804348	0.804348	0.817204	0.764045	0.833922	0.804348	0.773234	0.817204	0.764045	0.745247	0.754717	0.829787	0.641975	0.829787	0.663968	0.829787	0.636364	0.759398	0.558952	0.768657	0.526786	0.690476	0.669355	0.746048
th	f1_pos	0.870432	0.904992	0.776978	0.868552	0.908507	0.897893	0.781362	0.876033	0.874172	0.930818	0.827586	0.883415	0.855219	0.935837	0.855219	0.890701	0.843537	0.807018	0.3	0.977444	0.894309	0.917197	0.857143	0.968134	0.854271
	f1_neu	0.674473	0.695853	0.777538	0.658768	0.609337	0.602469	0.810924	0.652381	0.642686	0.548718	0.674473	0.595533	0.730942	0.418994	0.750552	0.59204	0.665094	0.701835	0.907336	0.354651	0.602469	0.440771	0.733781	0.368876	0.633771
	f1_neg	0.479339	0.704225	0.385965	0.773333	0.773333	0.491803	0.797386	0.781457	0.103093	0.704225	0.213592	0.781457	0.656934	0.516129	0.685714	0.637037	0.0631579	0.606061	0.0833333	0.695035	0.676259	0.466667	0.539683	0.626866	0.551754
ur	f1_pos	0.55	0.55	0.242424	0.342857	0.696629	0.432432	0.778947	0.473684	0.651163	0.651163	0.493506	0.585366	0.711111	0.696629	0.493506	0.453333	0.410959	0.512821	0.215385	0.388889	0.60241	0.585366	0.473684	0.619048	0.525471
	f1_neu	0.650794	0.721805	0.835616	0.661417	0.282828	0.482143	0.595041	0.75	0.411215	0.650794	0.349515	0.606557	0.365385	0.380952	0.682171	0.671875	0.425926	0.534483	0.425926	0.671875	0.396226	0.440367	0.740741	0.468468	0.550088
	f1_neg	0.613333	0.514286	0.716049	0.575342	0.746988	0.683544	0.649351	0.514286	0.492754	0.322581	0.776471	0.266667	0.555556	0.594595	0.575342	0.666667	0.447761	0.514286	0.776471	0.266667	0.613333	0.424242	0.492754	0.492754	0.553837
zh	f1_pos	0.870319	0.913159	0.848071	0.888285	0.862698	0.864501	0.834959	0.892581	0.886125	0.877839	0.858622	0.818631	0.884391	0.854516	0.889578	0.817657	0.67007	0.821546	0.729047	0.853141	0.831635	0.879593	0.856801	0.883087	0.849452
	f1_neu	0.277778	0.413953	0.37619	0.470852	0.472564	0.383886	0.626385	0.448237	0.21466	0.328431	0.226268	0.385799	0.368421	0.358604	0.460497	0.404678	0.195767	0.381969	0.246787	0.400938	0.338611	0.282116	0.463964	0.39718	0.371856
	f1_neg	0.909515	0.868345	0.899765	0.886136	0.905943	0.891418	0.869986	0.880268	0.843147	0.879732	0.839702	0.923077	0.902863	0.868892	0.864497	0.89769	0.924563	0.899765	0.913064	0.903891	0.903377	0.835657	0.860068	0.852797	0.88434
