# Supplementary material
Source: ML conference proceedings conference paper supplement (https://openreview.net/forum?id=7tMgzSvopH)
Supplement: supplementary_material [file f1_scores_per_domain.xlsx]

## Sheet: f1_scores_per_domain
model_experiment	category	f1_pos	f1_neg	f1_neu
FT_DistilmBERT	chats	0.7	0.47619	0.731707
FT_DistilmBERT	mixed	0.752033	0.649351	0.720859
FT_DistilmBERT	news	0.607595	0.5	0.855615
FT_DistilmBERT	poems	0.727273	0.666667	0
FT_DistilmBERT	reviews	0.937505	0.856775	0.470034
FT_DistilmBERT	social_media	0.744191	0.701414	0.682672
FT_LaBSE	chats	0.655172	0.647887	0.594595
FT_LaBSE	mixed	0.800781	0.731707	0.728659
FT_LaBSE	news	0.764045	0.769231	0.81768
FT_LaBSE	poems	0.6	0.666667	0
FT_LaBSE	reviews	0.963504	0.889181	0.495907
FT_LaBSE	social_media	0.808209	0.763038	0.662967
FT_MPNet	chats	0.721311	0.666667	0.619469
FT_MPNet	mixed	0.784158	0.743202	0.736364
FT_MPNet	news	0.607595	0.8	0.784091
FT_MPNet	poems	0.923077	1	0
FT_MPNet	reviews	0.962018	0.890916	0.476378
FT_MPNet	social_media	0.78052	0.760709	0.67543
FT_XLM-R	chats	0.677966	0.628571	0.710744
FT_XLM-R	mixed	0.784158	0.683544	0.771723
FT_XLM-R	news	0.641975	0.702703	0.855615
FT_XLM-R	poems	0.727273	1	0
FT_XLM-R	reviews	0.933246	0.855891	0.671108
FT_XLM-R	social_media	0.804293	0.694761	0.72024
FT_XLM-R-dist	chats	0.7	0.702703	0.771654
FT_XLM-R-dist	mixed	0.769539	0.712074	0.768095
FT_XLM-R-dist	news	0.513514	0.736842	0.824176
FT_XLM-R-dist	poems	0.6	1	0
FT_XLM-R-dist	reviews	0.959035	0.886114	0.467852
FT_XLM-R-dist	social_media	0.777517	0.739346	0.692462
FT_mBERT	chats	0.655172	0.545455	0.689076
FT_mBERT	mixed	0.670996	0.687697	0.801724
FT_mBERT	news	0.658537	0.628571	0.784091
FT_mBERT	poems	0.833333	0.666667	0
FT_mBERT	reviews	0.937899	0.863508	0.499624
FT_mBERT	social_media	0.737073	0.725924	0.68079
FT_mT5	chats	0.7	0.702703	0.470588
FT_mT5	mixed	0.786561	0.731707	0.728659
FT_mT5	news	0.735632	0.567164	0.867725
FT_mT5	poems	0.923077	0.666667	0
FT_mT5	reviews	0.950559	0.893474	0.506205
FT_mT5	social_media	0.78351	0.707999	0.65567
FT_mUSE-dist	chats	0.655172	0.545455	0.655172
FT_mUSE-dist	mixed	0.688034	0.695925	0.730594
FT_mUSE-dist	news	0.405797	0.702703	0.79096
FT_mUSE-dist	poems	0.727273	1	0.666667
FT_mUSE-dist	reviews	0.936023	0.883382	0.43242
FT_mUSE-dist	social_media	0.725872	0.750119	0.636822
HB_DistilmBERT	chats	0.8	0.344828	0.424242
HB_DistilmBERT	mixed	0.744376	0.424242	0.68038
HB_DistilmBERT	news	0.589744	0.523077	0.573333
HB_DistilmBERT	poems	0.727273	0.666667	0
HB_DistilmBERT	reviews	0.94809	0.782108	0.285784
HB_DistilmBERT	social_media	0.727358	0.638745	0.687352
HB_LaBSE	chats	0.7	0.666667	0.666667
HB_LaBSE	mixed	0.805447	0.589831	0.720859
HB_LaBSE	news	0.75	0.451613	0.81768
HB_LaBSE	poems	0.727273	1	0
HB_LaBSE	reviews	0.960982	0.837307	0.297696
HB_LaBSE	social_media	0.752229	0.725307	0.63766
HB_MPNet	chats	0.655172	0.567164	0.666667
HB_MPNet	mixed	0.759596	0.670927	0.702955
HB_MPNet	news	0.571429	0.666667	0.741176
HB_MPNet	poems	0.833333	1	0
HB_MPNet	reviews	0.948824	0.86829	0.403019
HB_MPNet	social_media	0.727506	0.726334	0.653711
HB_XLM-R	chats	0.741935	0.567164	0.655172
HB_XLM-R	mixed	0.682403	0.589831	0.815341
HB_XLM-R	news	0.571429	0.545455	0.830601
HB_XLM-R	poems	0.923077	0	0
HB_XLM-R	reviews	0.964835	0.842689	0.47221
HB_XLM-R	social_media	0.729135	0.649453	0.770494
HB_XLM-R-dist	chats	0.631579	0.647887	0.607143
HB_XLM-R-dist	mixed	0.704641	0.683544	0.728659
HB_XLM-R-dist	news	0.533333	0.523077	0.777143
HB_XLM-R-dist	poems	0.6	1	0
HB_XLM-R-dist	reviews	0.947723	0.824137	0.434178
HB_XLM-R-dist	social_media	0.7125	0.692168	0.666987
HB_mBERT	chats	0.835821	0.47619	0.357895
HB_mBERT	mixed	0.710084	0.555556	0.678288
HB_mBERT	news	0.552632	0.588235	0.784091
HB_mBERT	poems	0.727273	0.666667	0
HB_mBERT	reviews	0.942277	0.805223	0.336233
HB_mBERT	social_media	0.733998	0.631433	0.679061
HB_mT5	chats	0.78125	0.567164	0.455446
HB_mT5	mixed	0.762097	0.580205	0.720859
HB_mT5	news	0.777778	0.42623	0.849462
HB_mT5	poems	0.923077	0.666667	0
HB_mT5	reviews	0.961416	0.864816	0.426592
HB_mT5	social_media	0.784322	0.617781	0.705594
HB_mUSE-dist	chats	0.761905	0.451613	0.631579
HB_mUSE-dist	mixed	0.741803	0.575342	0.736364
HB_mUSE-dist	news	0.625	0.451613	0.836957
HB_mUSE-dist	poems	0.6	0.666667	0
HB_mUSE-dist	reviews	0.953974	0.818502	0.390688
HB_mUSE-dist	social_media	0.764093	0.647603	0.637492
HL_DistilmBERT	chats	0.835821	0.523077	0.340426
HL_DistilmBERT	mixed	0.776892	0.430189	0.569468
HL_DistilmBERT	news	0.641975	0.285714	0.763006
HL_DistilmBERT	poems	0.923077	0	0
HL_DistilmBERT	reviews	0.933147	0.740099	0.168416
HL_DistilmBERT	social_media	0.605797	0.626674	0.703171
HL_LaBSE	chats	0.655172	0.72	0.581818
HL_LaBSE	mixed	0.807767	0.675159	0.635025
HL_LaBSE	news	0.607595	0.42623	0.879581
HL_LaBSE	poems	0.727273	1	0
HL_LaBSE	reviews	0.939788	0.834635	0.377223
HL_LaBSE	social_media	0.698844	0.715772	0.681418
HL_MPNet	chats	0.677966	0.647887	0.581818
HL_MPNet	mixed	0.764588	0.599327	0.738275
HL_MPNet	news	0.804348	0.42623	0.81768
HL_MPNet	poems	0.727273	1	0
HL_MPNet	reviews	0.958599	0.820935	0.356983
HL_MPNet	social_media	0.683468	0.627628	0.737873
HL_XLM-R	chats	0.835821	0.523077	0.455446
HL_XLM-R	mixed	0.796078	0.540351	0.712963
HL_XLM-R	news	0.735632	0.5	0.81768
HL_XLM-R	poems	0.923077	0	0
HL_XLM-R	reviews	0.958675	0.753371	0.405754
HL_XLM-R	social_media	0.64826	0.599149	0.78104
HL_XLM-R-dist	chats	0.741935	0.78481	0.514286
HL_XLM-R-dist	mixed	0.803119	0.653722	0.632787
HL_XLM-R-dist	news	0.705882	0.567164	0.695122
HL_XLM-R-dist	poems	0.6	1	0
HL_XLM-R-dist	reviews	0.96476	0.778924	0.291447
HL_XLM-R-dist	social_media	0.753653	0.670146	0.628048
HL_mBERT	chats	0.852941	0.42623	0.322581
HL_mBERT	mixed	0.759596	0.545455	0.588832
HL_mBERT	news	0.589744	0.372881	0.748538
HL_mBERT	poems	1	0.666667	0
HL_mBERT	reviews	0.923737	0.789003	0.205833
HL_mBERT	social_media	0.617099	0.657031	0.68875
HL_mT5	chats	0.78125	0.5	0.285714
HL_mT5	mixed	0.798434	0.530035	0.694836
HL_mT5	news	0.791209	0.545455	0.763006
HL_mT5	poems	0.923077	0.666667	0
HL_mT5	reviews	0.960812	0.767393	0.286626
HL_mT5	social_media	0.615872	0.613413	0.733836
HL_mUSE-dist	chats	0.78125	0.523077	0.666667
HL_mUSE-dist	mixed	0.807767	0.47619	0.669856
HL_mUSE-dist	news	0.75	0.47619	0.733728
HL_mUSE-dist	poems	0.833333	1	0
HL_mUSE-dist	reviews	0.960604	0.761891	0.25559
HL_mUSE-dist	social_media	0.726764	0.562693	0.71802

## Sheet: Pivot Table
	category
	chats			mixed			news			poems			reviews			social_media
model_experiment	f1_pos	f1_neu	f1_neg	f1_pos	f1_neu	f1_neg	f1_pos	f1_neu	f1_neg	f1_pos	f1_neu	f1_neg	f1_pos	f1_neu	f1_neg	f1_pos	f1_neu	f1_neg
FT_DistilmBERT	0.7	0.731707	0.47619	0.752033	0.720859	0.649351	0.607595	0.855615	0.5	0.727273	0	0.666667	0.937505	0.470034	0.856775	0.744191	0.682672	0.701414
FT_LaBSE	0.655172	0.594595	0.647887	0.800781	0.728659	0.731707	0.764045	0.81768	0.769231	0.6	0	0.666667	0.963504	0.495907	0.889181	0.808209	0.662967	0.763038
FT_mBERT	0.655172	0.689076	0.545455	0.670996	0.801724	0.687697	0.658537	0.784091	0.628571	0.833333	0	0.666667	0.937899	0.499624	0.863508	0.737073	0.68079	0.725924
FT_MPNet	0.721311	0.619469	0.666667	0.784158	0.736364	0.743202	0.607595	0.784091	0.8	0.923077	0	1	0.962018	0.476378	0.890916	0.78052	0.67543	0.760709
FT_mT5	0.7	0.470588	0.702703	0.786561	0.728659	0.731707	0.735632	0.867725	0.567164	0.923077	0	0.666667	0.950559	0.506205	0.893474	0.78351	0.65567	0.707999
FT_mUSE-dist	0.655172	0.655172	0.545455	0.688034	0.730594	0.695925	0.405797	0.79096	0.702703	0.727273	0.666667	1	0.936023	0.43242	0.883382	0.725872	0.636822	0.750119
FT_XLM-R	0.677966	0.710744	0.628571	0.784158	0.771723	0.683544	0.641975	0.855615	0.702703	0.727273	0	1	0.933246	0.671108	0.855891	0.804293	0.72024	0.694761
FT_XLM-R-dist	0.7	0.771654	0.702703	0.769539	0.768095	0.712074	0.513514	0.824176	0.736842	0.6	0	1	0.959035	0.467852	0.886114	0.777517	0.692462	0.739346
HB_DistilmBERT	0.8	0.424242	0.344828	0.744376	0.68038	0.424242	0.589744	0.573333	0.523077	0.727273	0	0.666667	0.94809	0.285784	0.782108	0.727358	0.687352	0.638745
HB_LaBSE	0.7	0.666667	0.666667	0.805447	0.720859	0.589831	0.75	0.81768	0.451613	0.727273	0	1	0.960982	0.297696	0.837307	0.752229	0.63766	0.725307
HB_mBERT	0.835821	0.357895	0.47619	0.710084	0.678288	0.555556	0.552632	0.784091	0.588235	0.727273	0	0.666667	0.942277	0.336233	0.805223	0.733998	0.679061	0.631433
HB_MPNet	0.655172	0.666667	0.567164	0.759596	0.702955	0.670927	0.571429	0.741176	0.666667	0.833333	0	1	0.948824	0.403019	0.86829	0.727506	0.653711	0.726334
HB_mT5	0.78125	0.455446	0.567164	0.762097	0.720859	0.580205	0.777778	0.849462	0.42623	0.923077	0	0.666667	0.961416	0.426592	0.864816	0.784322	0.705594	0.617781
HB_mUSE-dist	0.761905	0.631579	0.451613	0.741803	0.736364	0.575342	0.625	0.836957	0.451613	0.6	0	0.666667	0.953974	0.390688	0.818502	0.764093	0.637492	0.647603
HB_XLM-R	0.741935	0.655172	0.567164	0.682403	0.815341	0.589831	0.571429	0.830601	0.545455	0.923077	0	0	0.964835	0.47221	0.842689	0.729135	0.770494	0.649453
HB_XLM-R-dist	0.631579	0.607143	0.647887	0.704641	0.728659	0.683544	0.533333	0.777143	0.523077	0.6	0	1	0.947723	0.434178	0.824137	0.7125	0.666987	0.692168
HL_DistilmBERT	0.835821	0.340426	0.523077	0.776892	0.569468	0.430189	0.641975	0.763006	0.285714	0.923077	0	0	0.933147	0.168416	0.740099	0.605797	0.703171	0.626674
HL_LaBSE	0.655172	0.581818	0.72	0.807767	0.635025	0.675159	0.607595	0.879581	0.42623	0.727273	0	1	0.939788	0.377223	0.834635	0.698844	0.681418	0.715772
HL_mBERT	0.852941	0.322581	0.42623	0.759596	0.588832	0.545455	0.589744	0.748538	0.372881	1	0	0.666667	0.923737	0.205833	0.789003	0.617099	0.68875	0.657031
HL_MPNet	0.677966	0.581818	0.647887	0.764588	0.738275	0.599327	0.804348	0.81768	0.42623	0.727273	0	1	0.958599	0.356983	0.820935	0.683468	0.737873	0.627628
HL_mT5	0.78125	0.285714	0.5	0.798434	0.694836	0.530035	0.791209	0.763006	0.545455	0.923077	0	0.666667	0.960812	0.286626	0.767393	0.615872	0.733836	0.613413
HL_mUSE-dist	0.78125	0.666667	0.523077	0.807767	0.669856	0.47619	0.75	0.733728	0.47619	0.833333	0	1	0.960604	0.25559	0.761891	0.726764	0.71802	0.562693
HL_XLM-R	0.835821	0.455446	0.523077	0.796078	0.712963	0.540351	0.735632	0.81768	0.5	0.923077	0	0	0.958675	0.405754	0.753371	0.64826	0.78104	0.599149
HL_XLM-R-dist	0.741935	0.514286	0.78481	0.803119	0.632787	0.653722	0.705882	0.695122	0.567164	0.6	0	1	0.96476	0.291447	0.778924	0.753653	0.628048	0.670146
