# Supplementary material
Source: ML conference proceedings conference paper supplement (https://openreview.net/forum?id=7tMgzSvopH)
Supplement: supplementary_material [file MMS - datasets filtering.xlsx]

## Sheet: Arkusz1
Dataset	Link	Is accepted?	Reason of filtering
ar_ajgt_twitter_ar.tsv	https://www.researchgate.net/publication/317501447_Arabic_Tweets_Sentimental_Analysis_Using_Machine_Learning	FALSE	2 class sentiment
ar_masc.tsv	https://journals.sagepub.com/doi/abs/10.1177/0165551516683908	FALSE	2 class sentiment
ar_tsac.tsv	https://aclanthology.org/W17-1307/	FALSE	2 class sentiment
ar_xed.tsv	https://arxiv.org/pdf/2011.01612.pdf	FALSE	2 class sentiment
bg_xed.tsv	https://arxiv.org/pdf/2011.01612.pdf	FALSE	2 class sentiment
bn_dataset.tsv	https://ieeexplore.ieee.org/document/8843450	FALSE	2 class sentiment
bn_universal_joy.tsv	https://aclanthology.org/2021.wassa-1.7.pdf	FALSE	2 class sentiment
br_xed.tsv	https://arxiv.org/pdf/2011.01612.pdf	FALSE	2 class sentiment
bs_xed.tsv	https://arxiv.org/pdf/2011.01612.pdf	FALSE	2 class sentiment
cn_xed.tsv	https://arxiv.org/pdf/2011.01612.pdf	FALSE	2 class sentiment
cs_xed.tsv	https://arxiv.org/pdf/2011.01612.pdf	FALSE	2 class sentiment
da_xed.tsv	https://arxiv.org/pdf/2011.01612.pdf	FALSE	2 class sentiment
de_universal_joy.tsv	https://aclanthology.org/2021.wassa-1.7.pdf	FALSE	2 class sentiment
de_xed.tsv	https://arxiv.org/pdf/2011.01612.pdf	FALSE	2 class sentiment
el_xed.tsv	https://arxiv.org/pdf/2011.01612.pdf	FALSE	2 class sentiment
en_lmrd_aclImdb.tsv	https://www.aclweb.org/anthology/P11-1015.pdf	FALSE	2 class sentiment
en_movie_reviews.tsv	https://www.cs.cornell.edu/home/llee/papers/cutsent.pdf	FALSE	2 class sentiment
en_rtsa.tsv	https://arxiv.org/pdf/1509.07612.pdf	FALSE	2 class sentiment
en_sentistrength_2000entities.tsv	https://aclanthology.org/C12-1113.pdf	FALSE	2 class sentiment
en_sts.tsv	http://ceur-ws.org/Vol-1096/paper1.pdf	FALSE	2 class sentiment
en_universal_joy.tsv	https://aclanthology.org/2021.wassa-1.7.pdf	FALSE	2 class sentiment
en_wassa2019.tsv	https://arxiv.org/pdf/1904.03164.pdf	FALSE	2 class sentiment
en_xed.tsv	https://arxiv.org/pdf/2011.01612.pdf	FALSE	2 class sentiment
en_yelp_review.tsv	https://proceedings.neurips.cc/paper/2015/file/250cf8b51c773f3f8dc8b4be867a9a02-Paper.pdf	FALSE	2 class sentiment
es_universal_joy.tsv	https://aclanthology.org/2021.wassa-1.7.pdf	FALSE	2 class sentiment
es_xed.tsv	https://arxiv.org/pdf/2011.01612.pdf	FALSE	2 class sentiment
et_xed.tsv	https://arxiv.org/pdf/2011.01612.pdf	FALSE	2 class sentiment
eu_xed.tsv	https://arxiv.org/pdf/2011.01612.pdf	FALSE	2 class sentiment
fa_xed.tsv	https://arxiv.org/pdf/2011.01612.pdf	FALSE	2 class sentiment
fi_xed.tsv	https://arxiv.org/pdf/2011.01612.pdf	FALSE	2 class sentiment
fr_allocine.tsv	https://github.com/TheophileBlard/french-sentiment-analysis-with-bert	FALSE	2 class sentiment
fr_universal_joy.tsv	https://aclanthology.org/2021.wassa-1.7.pdf	FALSE	2 class sentiment
fr_xed.tsv	https://arxiv.org/pdf/2011.01612.pdf	FALSE	2 class sentiment
gl_xed.tsv	https://arxiv.org/pdf/2011.01612.pdf	FALSE	2 class sentiment
he_xed.tsv	https://arxiv.org/pdf/2011.01612.pdf	FALSE	2 class sentiment
hi_universal_joy.tsv	https://aclanthology.org/2021.wassa-1.7.pdf	FALSE	2 class sentiment
hr_xed.tsv	https://arxiv.org/pdf/2011.01612.pdf	FALSE	2 class sentiment
hu_xed.tsv	https://arxiv.org/pdf/2011.01612.pdf	FALSE	2 class sentiment
id_indonlu_smsa.tsv	https://ieeexplore.ieee.org/document/8904199	FALSE	2 class sentiment
id_universal_joy.tsv	https://aclanthology.org/2021.wassa-1.7.pdf	FALSE	2 class sentiment
id_xed.tsv	https://arxiv.org/pdf/2011.01612.pdf	FALSE	2 class sentiment
is_xed.tsv	https://arxiv.org/pdf/2011.01612.pdf	FALSE	2 class sentiment
it_feel.tsv	https://aclanthology.org/2021.wassa-1.8.pdf	FALSE	2 class sentiment
it_universal_joy.tsv	https://aclanthology.org/2021.wassa-1.7.pdf	FALSE	2 class sentiment
it_xed.tsv	https://arxiv.org/pdf/2011.01612.pdf	FALSE	2 class sentiment
ja_xed.tsv	https://arxiv.org/pdf/2011.01612.pdf	FALSE	2 class sentiment
km_universal_joy.tsv	https://aclanthology.org/2021.wassa-1.7.pdf	FALSE	2 class sentiment
mk_xed.tsv	https://arxiv.org/pdf/2011.01612.pdf	FALSE	2 class sentiment
ml_malayalam_sentiment.tsv	https://arxiv.org/pdf/2006.00210.pdf	FALSE	2 class sentiment
ml_xed.tsv	https://arxiv.org/pdf/2011.01612.pdf	FALSE	2 class sentiment
ms_universal_joy.tsv	https://aclanthology.org/2021.wassa-1.7.pdf	FALSE	2 class sentiment
ms_xed.tsv	https://arxiv.org/pdf/2011.01612.pdf	FALSE	2 class sentiment
my_universal_joy.tsv	https://aclanthology.org/2021.wassa-1.7.pdf	FALSE	2 class sentiment
nl_dbrd.tsv	https://arxiv.org/pdf/1910.00896.pdf	FALSE	2 class sentiment
nl_universal_joy.tsv	https://aclanthology.org/2021.wassa-1.7.pdf	FALSE	2 class sentiment
nl_xed.tsv	https://arxiv.org/pdf/2011.01612.pdf	FALSE	2 class sentiment
no_xed.tsv	https://arxiv.org/pdf/2011.01612.pdf	FALSE	2 class sentiment
pl_ermlab.tsv	https://ermlab.com/en/blog/nlp/polish-sentiment-analysis-using-keras-and-word2vec/	FALSE	2 class sentiment
pl_xed.tsv	https://arxiv.org/pdf/2011.01612.pdf	FALSE	2 class sentiment
pt_emocoes_br.tsv	http://sites.labic.icmc.usp.br/wti2012/artigos/105251.pdf	FALSE	2 class sentiment
pt_universal_joy.tsv	https://aclanthology.org/2021.wassa-1.7.pdf	FALSE	2 class sentiment
pt_xed.tsv	https://arxiv.org/pdf/2011.01612.pdf	FALSE	2 class sentiment
ro_laroseda.tsv	https://aclanthology.org/2021.eacl-main.81.pdf	FALSE	2 class sentiment
ro_universal_joy.tsv	https://aclanthology.org/2021.wassa-1.7.pdf	FALSE	2 class sentiment
ro_xed.tsv	https://arxiv.org/pdf/2011.01612.pdf	FALSE	2 class sentiment
ru_xed.tsv	https://arxiv.org/pdf/2011.01612.pdf	FALSE	2 class sentiment
se_swedish_reviews.tsv	https://huggingface.co/datasets/swedish_reviews	FALSE	2 class sentiment
sk_xed.tsv	https://arxiv.org/pdf/2011.01612.pdf	FALSE	2 class sentiment
sl_xed.tsv	https://arxiv.org/pdf/2011.01612.pdf	FALSE	2 class sentiment
sr_xed.tsv	https://arxiv.org/pdf/2011.01612.pdf	FALSE	2 class sentiment
sv_xed.tsv	https://arxiv.org/pdf/2011.01612.pdf	FALSE	2 class sentiment
ta_tamil_sentiment.tsv	https://aclanthology.org/2020.sltu-1.28/	FALSE	2 class sentiment
te_books_sentiraama.tsv	https://aclanthology.org/L18-1100.pdf	FALSE	2 class sentiment
te_movies_sentiraama.tsv	https://aclanthology.org/L18-1100.pdf	FALSE	2 class sentiment
te_product_sentiraama.tsv	https://aclanthology.org/L18-1100.pdf	FALSE	2 class sentiment
te_song_sentiraama.tsv	https://aclanthology.org/L18-1100.pdf	FALSE	2 class sentiment
th_universal_joy.tsv	https://aclanthology.org/2021.wassa-1.7.pdf	FALSE	2 class sentiment
th_xed.tsv	https://arxiv.org/pdf/2011.01612.pdf	FALSE	2 class sentiment
tl_universal_joy.tsv	https://aclanthology.org/2021.wassa-1.7.pdf	FALSE	2 class sentiment
tr_xed.tsv	https://arxiv.org/pdf/2011.01612.pdf	FALSE	2 class sentiment
tw_xed.tsv	https://arxiv.org/pdf/2011.01612.pdf	FALSE	2 class sentiment
vi_universal_joy.tsv	https://aclanthology.org/2021.wassa-1.7.pdf	FALSE	2 class sentiment
vi_xed.tsv	https://arxiv.org/pdf/2011.01612.pdf	FALSE	2 class sentiment
zh_universal_joy.tsv	https://aclanthology.org/2021.wassa-1.7.pdf	FALSE	2 class sentiment
zh_xed.tsv	https://arxiv.org/pdf/2011.01612.pdf	FALSE	2 class sentiment
ar_arsentdl.tsv	https://arxiv.org/pdf/1906.01830.pdf	TRUE	Accepted
ar_astd.tsv	https://www.aclweb.org/anthology/D15-1299.pdf	TRUE	Accepted
ar_bbn.tsv	https://aclanthology.org/N15-1078.pdf	TRUE	Accepted
ar_brad.tsv	https://ieeexplore.ieee.org/document/7945800	TRUE	Accepted
ar_hard.tsv	https://link.springer.com/chapter/10.1007/978-3-319-67056-0_3	TRUE	Accepted
ar_labr.tsv	https://aclanthology.org/P13-2088/	TRUE	Accepted
ar_oclar.tsv	https://ieeexplore.ieee.org/document/8716394	TRUE	Accepted
ar_semeval_2017.tsv	https://alt.qcri.org/semeval2017/task4/data/uploads/semeval2017-task4.pdf	TRUE	Accepted
ar_syria_corpus.tsv	https://aclanthology.org/N15-1078.pdf	TRUE	Accepted
bg_twitter_sentiment.tsv	https://arxiv.org/pdf/1602.07563.pdf#page=24&zoom=100,96,798	TRUE	Accepted
bs_twitter_sentiment.tsv	https://arxiv.org/pdf/1602.07563.pdf#page=24&zoom=100,96,791	TRUE	Accepted
cs_facebook.tsv	https://aclanthology.org/W13-1609.pdf	TRUE	Accepted
cs_mall_product_reviews.tsv	https://aclanthology.org/W13-1609.pdf	TRUE	Accepted
cs_news_stance.tsv	https://aclanthology.org/W13-1609.pdf	TRUE	Accepted
de_dai_labor.tsv	https://dai-labor.de/en/publications/language-independent-twitter-sentiment-analysis-2/	TRUE	Accepted
de_ifeel.tsv	https://www.semanticscholar.org/paper/Language-Independent-Twitter-Sentiment-Analysis-Narr-H%C3%BClfenhaus/2005b11e28081d5775b21a65144932156613df4ee	TRUE	Accepted
de_multilan_amazon.tsv	https://arxiv.org/pdf/2010.02573v1.pdf	TRUE	Accepted
de_omp.tsv	https://aclanthology.org/L18-1253.pdf	TRUE	Accepted
de_sb10k.tsv	https://aclanthology.org/W17-1106/	TRUE	Accepted
de_twitter_sentiment.tsv	https://arxiv.org/pdf/1602.07563.pdf#page=24&zoom=100,96,795	TRUE	Accepted
en_amazon.tsv	https://aclanthology.org/D19-1018/	TRUE	Accepted
en_dai_labor.tsv	https://dai-labor.de/en/publications/language-independent-twitter-sentiment-analysis-2/	TRUE	Accepted
en_financial_phrasebank_sentences_75agree.tsv	https://arxiv.org/abs/1307.5336	TRUE	Accepted
en_multilan_amazon.tsv	https://arxiv.org/pdf/2010.02573v1.pdf	TRUE	Accepted
en_per_sent.tsv	https://arxiv.org/pdf/2011.06128.pdf	TRUE	Accepted
en_poem_sentiment.tsv	https://arxiv.org/abs/2011.02686	TRUE	Accepted
en_semeval_2017.tsv	https://alt.qcri.org/semeval2017/task4/data/uploads/semeval2017-task4.pdf	TRUE	Accepted
en_sentistrength.tsv	https://dl.acm.org/doi/10.1002/asi.21662	TRUE	Accepted
en_silicone_meld_s.tsv	https://arxiv.org/abs/2009.11152	TRUE	Accepted
en_silicone_sem.tsv	https://arxiv.org/abs/2009.11152	TRUE	Accepted
en_tweet_airlines.tsv	https://www.kaggle.com/crowdflower/twitter-airline-sentiment	TRUE	Accepted
en_tweets_sanders.tsv	Sanders, N.J. (2011) Sanders-Twitter Sentiment Corpus. Sanders Analytics LLC.	TRUE	Accepted
en_twitter_sentiment.tsv	https://arxiv.org/pdf/1602.07563.pdf#page=24&zoom=100,96,796	TRUE	Accepted
en_v_amazon.csv	https://www.researchgate.net/publication/275828927_VADER_A_Parsimonious_Rule-based_Model_for_Sentiment_Analysis_of_Social_Media_Text	TRUE	Accepted
en_v_movie_reviews.csv	https://www.researchgate.net/publication/275828927_VADER_A_Parsimonious_Rule-based_Model_for_Sentiment_Analysis_of_Social_Media_Text	TRUE	Accepted
en_v_nyt.csv	https://www.researchgate.net/publication/275828927_VADER_A_Parsimonious_Rule-based_Model_for_Sentiment_Analysis_of_Social_Media_Text	TRUE	Accepted
en_v_twitter.csv	https://www.researchgate.net/publication/275828927_VADER_A_Parsimonious_Rule-based_Model_for_Sentiment_Analysis_of_Social_Media_Text	TRUE	Accepted
es_muchocine.tsv	https://rua.ua.es/dspace/bitstream/10045/8067/1/PLN_41_09.pdf	TRUE	Accepted
es_multilan_amazon.tsv	https://arxiv.org/pdf/2010.02573v1.pdf	TRUE	Accepted
es_paper_reviews.csv	https://sentic.net/wisdom2017fuentes.pdf	TRUE	Accepted
es_paper_reviews.tsv	https://sentic.net/wisdom2017fuentes.pdf	TRUE	Accepted
es_semeval2020.tsv	https://arxiv.org/abs/2008.04277	TRUE	Accepted
es_twitter_sentiment.tsv	https://arxiv.org/pdf/1602.07563.pdf#page=24&zoom=100,96,800	TRUE	Accepted
fa_sentipers.tsv	https://arxiv.org/abs/1801.07737?context=cs	TRUE	Accepted
fr_dai_labor.tsv	https://dai-labor.de/en/publications/language-independent-twitter-sentiment-analysis-2/	TRUE	Accepted
fr_ifeel.tsv	https://www.semanticscholar.org/paper/Language-Independent-Twitter-Sentiment-Analysis-Narr-H%C3%BClfenhaus/2005b11e28081d5775b21a65144932156613df4e	TRUE	Accepted
fr_multilan_amazon.tsv	https://arxiv.org/pdf/2010.02573v1.pdf	TRUE	Accepted
he_hebrew_sentiment.tsv	https://aclanthology.org/C18-1190.pdf	TRUE	Accepted
hi_semeval2020.tsv	https://arxiv.org/abs/2008.04277	TRUE	Accepted
hr_sentiment_news_document.tsv	https://doi.org/10.3390/app10175993	TRUE	Accepted
hr_twitter_sentiment.tsv	https://arxiv.org/pdf/1602.07563.pdf#page=24&zoom=100,96,797	TRUE	Accepted
hu_twitter_sentiment.tsv	https://arxiv.org/pdf/1602.07563.pdf#page=24&zoom=100,96,794	TRUE	Accepted
it_evalita2016.tsv	http://ceur-ws.org/Vol-1749/paper_026.pdf	TRUE	Accepted
it_multiemotions.tsv	http://ceur-ws.org/Vol-2769/paper_08.pdf	TRUE	Accepted
ja_multilan_amazon.tsv	https://arxiv.org/pdf/2010.02573v1.pdf	TRUE	Accepted
lv_ltec_sentiment.tsv	https://arxiv.org/abs/2007.05194	TRUE	Accepted
pl_klej_allegro_reviews.tsv	https://arxiv.org/pdf/2005.00630.pdf	TRUE	Accepted
pl_opi_lil_2012.tsv	https://sci-hub.se/https://doi.org/10.1177/0894439312436512	TRUE	Accepted
pl_polemo.tsv	https://aclanthology.org/K19-1092/	TRUE	Accepted
pl_twitter_sentiment.tsv	https://arxiv.org/pdf/1602.07563.pdf#page=24&zoom=100,96,793	TRUE	Accepted
pt_dai_labor.tsv	https://dai-labor.de/en/publications/language-independent-twitter-sentiment-analysis-2/	TRUE	Accepted
pt_ifeel.tsv	https://www.semanticscholar.org/paper/Language-Independent-Twitter-Sentiment-Analysis-Narr-H%C3%BClfenhaus/2005b11e28081d5775b21a65144932156613df4e	TRUE	Accepted
pt_tweet_sent_br.tsv	https://arxiv.org/pdf/1712.08917.pdf	TRUE	Accepted
pt_twitter_sentiment.tsv	https://arxiv.org/pdf/1602.07563.pdf#page=24&zoom=100,96,792	TRUE	Accepted
ru_sentiment.tsv	http://www.cs.uml.edu/~arum/publications/Rogers_Romanov_Rumshisky_COLING2018_RuSentiment.pdf	TRUE	Accepted
ru_twitter_sentiment.tsv	https://arxiv.org/pdf/1602.07563.pdf#page=24&zoom=100,96,804	TRUE	Accepted
sk_twitter_sentiment.tsv	https://arxiv.org/pdf/1602.07563.pdf#page=24&zoom=100,96,802	TRUE	Accepted
sl_sentinews.tsv	https://link.springer.com/article/10.1007/s10579-018-9413-3	TRUE	Accepted
sl_twitter_sentiment.tsv	https://arxiv.org/pdf/1602.07563.pdf#page=24&zoom=100,96,801	TRUE	Accepted
sq_twitter_sentiment.tsv	https://arxiv.org/pdf/1602.07563.pdf#page=24&zoom=100,96,790	TRUE	Accepted
sr_senticomments.tsv	https://journals.plos.org/plosone/article?id=10.1371/journal.pone.0242050	TRUE	Accepted
sr_serb_movie_reviews.tsv	http://www.lrec-conf.org/proceedings/lrec2016/pdf/284_Paper.pdf	TRUE	Accepted
sr_twitter_sentiment.tsv	https://arxiv.org/pdf/1602.07563.pdf#page=24&zoom=100,96,803	TRUE	Accepted
sv_twitter_sentiment.tsv	https://arxiv.org/pdf/1602.07563.pdf#page=24&zoom=100,96,799	TRUE	Accepted
th_wisesight_sentiment.tsv	https://huggingface.co/datasets/wisesight_sentiment	TRUE	Accepted
th_wongnai_reviews.tsv	https://huggingface.co/datasets/wongnai_reviews	TRUE	Accepted
ur_roman_urdu.tsv	http://paper.ijcsns.org/07_book/201801/20180117.pdf	TRUE	Accepted
zh_hotel_reviews.tsv	https://aclanthology.org/Y15-2030.pdf	TRUE	Accepted
zh_multilan_amazon.tsv	https://arxiv.org/pdf/2010.02573v1.pdf	TRUE	Accepted
ar_ifeel.tsv	https://ieeexplore.ieee.org/document/6716448	FALSE	Insufficient information on dataset creation
ar_product_reviews.csv		FALSE	Insufficient information on dataset creation
de_chatmania.tsv		FALSE	Insufficient information on dataset creation
en_bags_of_popcorn.tsv	https://github.com/reinwzhang/NLP_Movie-Sentiment-Analysis	FALSE	Insufficient information on dataset creation
es_ifeel.tsv		FALSE	Insufficient information on dataset creation
it_ifeel.tsv		FALSE	Insufficient information on dataset creation
ko_naver_movie_reviews.tsv	https://github.com/e9t/nsmc	FALSE	Insufficient information on dataset creation
lt_financial_news.tsv	https://www.kaggle.com/rokastrimaitis/lithuanian-financial-news-dataset-and-bigrams?select=dataset%28original%29.csv	FALSE	Insufficient information on dataset creation
lv_tweet_corpus.tsv	https://github.com/FnTm/latvian-tweet-sentiment-corpus	FALSE	Insufficient information on dataset creation
nl_ifeel.tsv		FALSE	Insufficient information on dataset creation
pl_opi_lil_2015.tsv	https://github.com/OPI-LIL/opi-lil.github.io/blob/master/assets/datasets/POL2015T.csv	FALSE	Insufficient information on dataset creation
pt_minerandodados.tsv	https://www.kaggle.com/code/leandrodoze/sentiment-analysis-in-portuguese	FALSE	Insufficient information on dataset creation
ro_ro_sent.tsv		FALSE	Insufficient information on dataset creation
ru_ifeel.tsv		FALSE	Insufficient information on dataset creation
sk_sentigrade.tsv		FALSE	Insufficient information on dataset creation
ta_film_reviews.tsv	https://www.kaggle.com/sudalairajkumar/tamil-nlp	FALSE	Insufficient information on dataset creation
tr_turkish_movie_sentiment_turkishmoviesentiment.tsv		FALSE	Insufficient information on dataset creation
tr_turkish_product_reviews.tsv		FALSE	Insufficient information on dataset creation
en_yelpnlg.tsv	https://arxiv.org/pdf/1906.01334.pdf	FALSE	Machine-generated texts
af_tatoeba.csv		FALSE	Our internal dataset
ar_arq_tatoeba.csv		FALSE	Our internal dataset
ar_category_names.csv		FALSE	Our internal dataset
ar_qaym_restaurants.csv		FALSE	Our internal dataset
ar_tatoeba.csv		FALSE	Our internal dataset
ar_tripadv_attr.csv		FALSE	Our internal dataset
ar_tripadv_hotels.csv		FALSE	Our internal dataset
ar_tripadv_restaurants.csv		FALSE	Our internal dataset
ar_tweets.csv		FALSE	Our internal dataset
az_tatoeba.csv		FALSE	Our internal dataset
be_tatoeba.csv		FALSE	Our internal dataset
bg_tatoeba.csv		FALSE	Our internal dataset
bn_tatoeba.csv		FALSE	Our internal dataset
ca_tatoeba.csv		FALSE	Our internal dataset
cs_tatoeba.csv		FALSE	Our internal dataset
da_tatoeba.csv		FALSE	Our internal dataset
de_booking.csv		FALSE	Our internal dataset
de_category_names.csv		FALSE	Our internal dataset
de_fine_tuning.csv		FALSE	Our internal dataset
de_nds_tatoeba.csv		FALSE	Our internal dataset
de_tatoeba.csv		FALSE	Our internal dataset
de_wikipedia.csv		FALSE	Our internal dataset
el_tatoeba.csv		FALSE	Our internal dataset
en_booking.csv		FALSE	Our internal dataset
en_category_names.csv		FALSE	Our internal dataset
en_dialogue.csv		FALSE	Our internal dataset
en_fine_tuning.csv		FALSE	Our internal dataset
en_fuckups_20201022.csv		FALSE	Our internal dataset
en_fuckups_sentiment_20200709.csv		FALSE	Our internal dataset
en_nuclear_energy.csv		FALSE	Our internal dataset
en_occupation.csv		FALSE	Our internal dataset
en_product_names.csv		FALSE	Our internal dataset
en_product_reviews.csv		FALSE	Our internal dataset
en_tatoeba.csv		FALSE	Our internal dataset
en_tenzin_20201022.csv		FALSE	Our internal dataset
en_wikipedia.csv		FALSE	Our internal dataset
eo_tatoeba.csv		FALSE	Our internal dataset
es_booking.csv		FALSE	Our internal dataset
es_cbk_tatoeba.csv		FALSE	Our internal dataset
es_fine_tuning.csv		FALSE	Our internal dataset
es_tatoeba.csv		FALSE	Our internal dataset
es_wikipedia.csv		FALSE	Our internal dataset
et_tatoeba.csv		FALSE	Our internal dataset
eu_tatoeba.csv		FALSE	Our internal dataset
fa_pes_tatoeba.csv		FALSE	Our internal dataset
fi_tatoeba.csv		FALSE	Our internal dataset
fr_booking.csv		FALSE	Our internal dataset
fr_fine_tuning.csv		FALSE	Our internal dataset
fr_tatoeba.csv		FALSE	Our internal dataset
fr_wikipedia.csv		FALSE	Our internal dataset
he_tatoeba.csv		FALSE	Our internal dataset
hi_tatoeba.csv		FALSE	Our internal dataset
hr_tatoeba.csv		FALSE	Our internal dataset
hu_category_names.csv		FALSE	Our internal dataset
hu_tatoeba.csv		FALSE	Our internal dataset
ia_tatoeba.csv		FALSE	Our internal dataset
id_booking.csv		FALSE	Our internal dataset
id_tatoeba.csv		FALSE	Our internal dataset
id_wikipedia.csv		FALSE	Our internal dataset
ie_tatoeba.csv		FALSE	Our internal dataset
ilo_tatoeba.csv		FALSE	Our internal dataset
io_tatoeba.csv		FALSE	Our internal dataset
is_tatoeba.csv		FALSE	Our internal dataset
it_booking.csv		FALSE	Our internal dataset
it_fine_tuning.csv		FALSE	Our internal dataset
it_tatoeba.csv		FALSE	Our internal dataset
it_wikipedia.csv		FALSE	Our internal dataset
jbo_tatoeba.csv		FALSE	Our internal dataset
kab_tatoeba.csv		FALSE	Our internal dataset
ko_tatoeba.csv		FALSE	Our internal dataset
la_tatoeba.csv		FALSE	Our internal dataset
lfn_tatoeba.csv		FALSE	Our internal dataset
lt_tatoeba.csv		FALSE	Our internal dataset
mk_tatoeba.csv		FALSE	Our internal dataset
mr_tatoeba.csv		FALSE	Our internal dataset
ms_tatoeba.csv		FALSE	Our internal dataset
my_dtp_tatoeba.csv		FALSE	Our internal dataset
nb_tatoeba.csv		FALSE	Our internal dataset
nl_booking.csv		FALSE	Our internal dataset
nl_fine_tuning.csv		FALSE	Our internal dataset
nl_tatoeba.csv		FALSE	Our internal dataset
nl_wikipedia.csv		FALSE	Our internal dataset
nn_tatoeba.csv		FALSE	Our internal dataset
pl_allegro_positive.csv		FALSE	Our internal dataset
pl_booking.csv		FALSE	Our internal dataset
pl_category_names.csv		FALSE	Our internal dataset
pl_fine_tuning.csv		FALSE	Our internal dataset
pl_fuckups_20201022.csv		FALSE	Our internal dataset
pl_fuckups_sentiment_20200709.csv		FALSE	Our internal dataset
pl_olx.csv		FALSE	Our internal dataset
pl_perfume.csv		FALSE	Our internal dataset
pl_reviews_2.csv		FALSE	Our internal dataset
pl_reviews.csv		FALSE	Our internal dataset
pl_sklad.csv		FALSE	Our internal dataset
pl_tagger_20190305_blogs.csv		FALSE	Our internal dataset
pl_tagger_20190305_facebook.csv		FALSE	Our internal dataset
pl_tagger_20190305_forum.csv		FALSE	Our internal dataset
pl_tagger_20190305_instagram.csv		FALSE	Our internal dataset
pl_tagger_20190305_news.csv		FALSE	Our internal dataset
pl_tagger_20190305_other.csv		FALSE	Our internal dataset
pl_tagger_20190305_twitter.csv		FALSE	Our internal dataset
pl_tagger_20190305_video.csv		FALSE	Our internal dataset
pl_tatoeba.csv		FALSE	Our internal dataset
pl_underwear.csv		FALSE	Our internal dataset
pl_wikipedia.csv		FALSE	Our internal dataset
pt_tatoeba.csv		FALSE	Our internal dataset
ro_tatoeba.csv		FALSE	Our internal dataset
ru_booking.csv		FALSE	Our internal dataset
ru_tatoeba.csv		FALSE	Our internal dataset
ru_wikipedia.csv		FALSE	Our internal dataset
sk_tatoeba.csv		FALSE	Our internal dataset
sr_category_names.csv		FALSE	Our internal dataset
sr_tatoeba.csv		FALSE	Our internal dataset
sv_tatoeba.csv		FALSE	Our internal dataset
tl_tatoeba.csv		FALSE	Our internal dataset
tlh_tatoeba.csv		FALSE	Our internal dataset
tr_booking.csv		FALSE	Our internal dataset
tr_fine_tuning.csv		FALSE	Our internal dataset
tr_reviews.csv		FALSE	Our internal dataset
tr_tatoeba.csv		FALSE	Our internal dataset
tr_wikipedia.csv		FALSE	Our internal dataset
ug_tatoeba.csv		FALSE	Our internal dataset
uk_tatoeba.csv		FALSE	Our internal dataset
ur_tatoeba.csv		FALSE	Our internal dataset
vi_tatoeba.csv		FALSE	Our internal dataset
vo_tatoeba.csv		FALSE	Our internal dataset
zh_category_names.csv		FALSE	Our internal dataset
en_rotten_tomatoes.tsv		FALSE	The sentiment of the sentences was inferred from the sentiment of the whole text review, which may result in poor quality
