# Supplementary material
Source: ML conference proceedings conference paper supplement (https://openreview.net/forum?id=7tMgzSvopH)
Supplement: supplementary_material [file mms_suplements.docx]

MMS - Massively Multilingual Sentiment Dataset and Benchmark

This is a static version of our online dataset, and benchmark documentation is available here:

- <https://brand24-ai.github.io/mms_benchmark/>

We advise you to look into online documentation that is much more interactive and easier to read and ingest.
